# Supplementary material for: Novel co-crystals with π-hole interactions between iodide anions and quinoid rings involving charge transfer
Source: Royal Society of Chemistry journal article supplement (doi:10.1039/d1ce01156a), 2021-01-01
Supplement: d1ce01156a1.pdf [file d1ce01156a1.pdf]

# Novel co-crystals with $\pi$ -hole interactions between iodide anions and quinoid rings involving charge transfer

## Supplement

Valentina Milašinović and Krešimir Molčanov

Ruđer Bošković Institute, Bijenička 54, Zagreb HR-10000, Croatia

e-mail: kmolcano@irb.hr

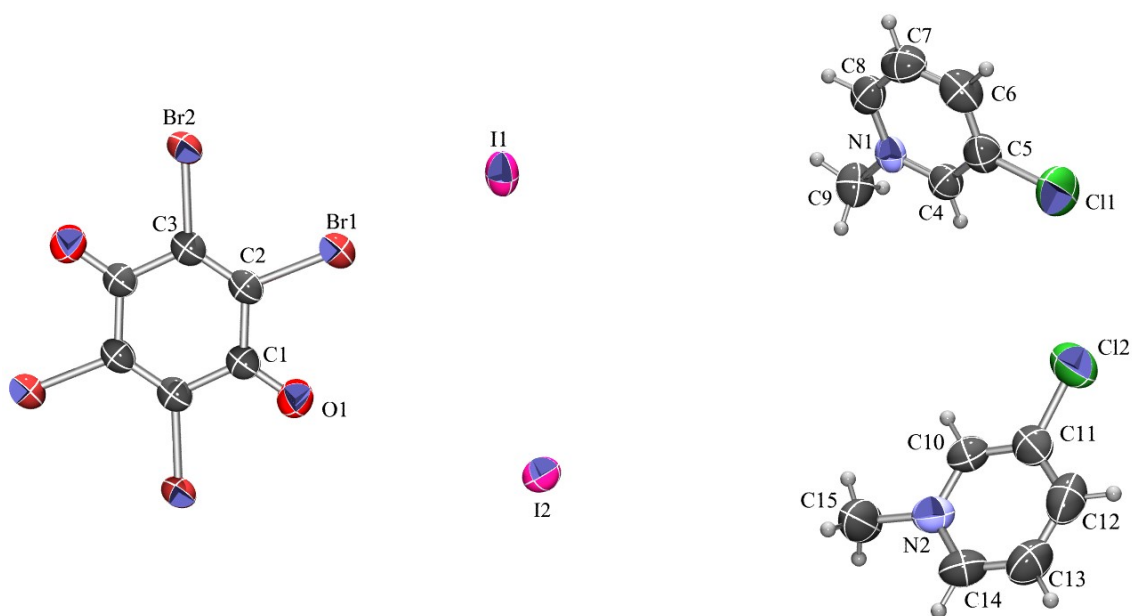

**Figure S1** ORTEP-3 drawing of asymmetric unit of **1** with the atom numbering scheme. Displacement ellipsoids are drawn for the probability of 50% and hydrogen atoms are shown as spheres of arbitrary radii.

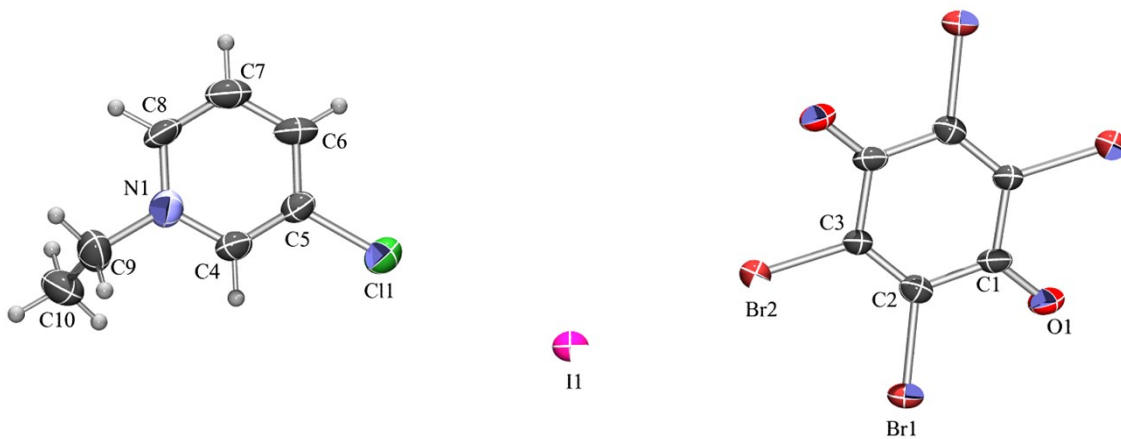

**Figure S2** ORTEP-3 drawing of asymmetric unit of **2** with the atom numbering scheme. Displacement ellipsoids are drawn for the probability of 50% and hydrogen atoms are shown as spheres of arbitrary radii.

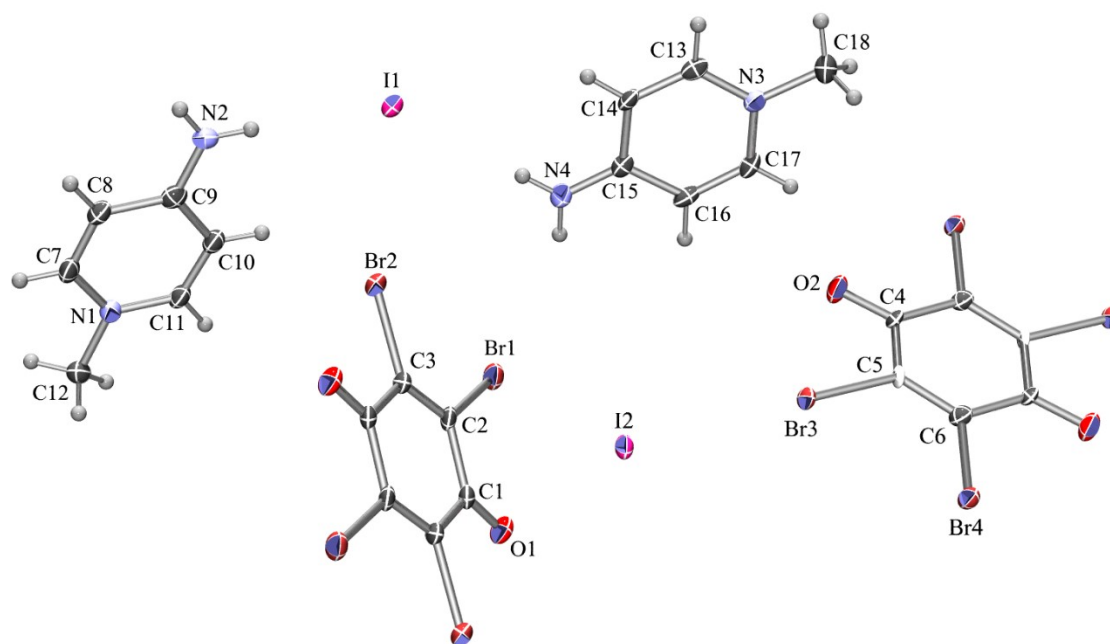

**Figure S3** ORTEP drawings of asymmetric unit of **3** with the atom numbering schemes. Displacement ellipsoids are drawn for the probability of 50% and hydrogen atoms are shown as spheres of arbitrary radii.

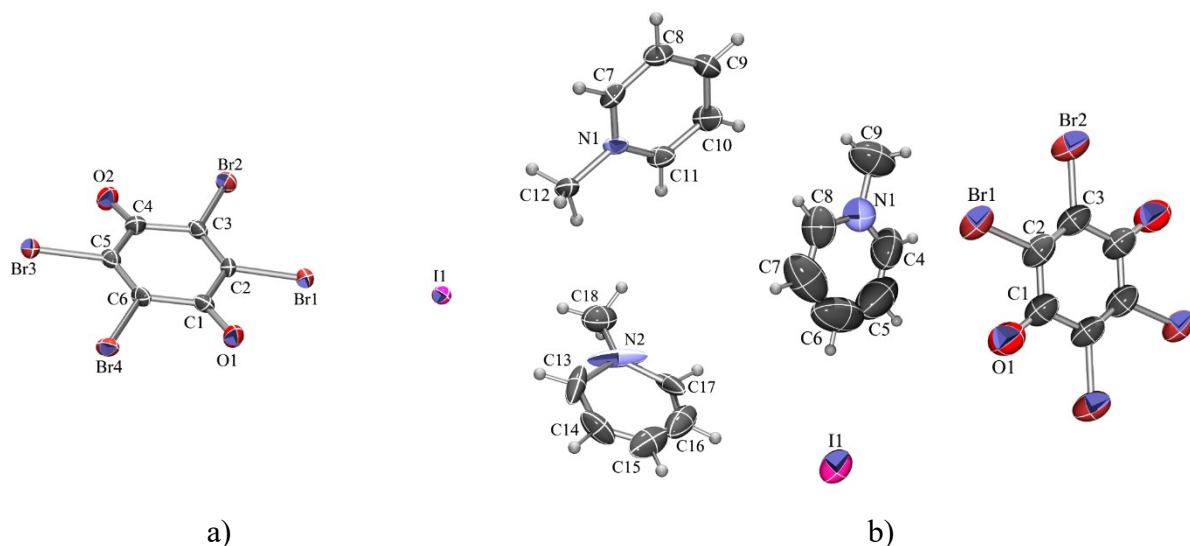

**Figure S4** ORTEP drawing of asymmetric unit of **4** at: a) 100 K and b) room temperature. Displacement ellipsoids are drawn for the probability of 50% and hydrogen atoms are shown as spheres of arbitrary radii.

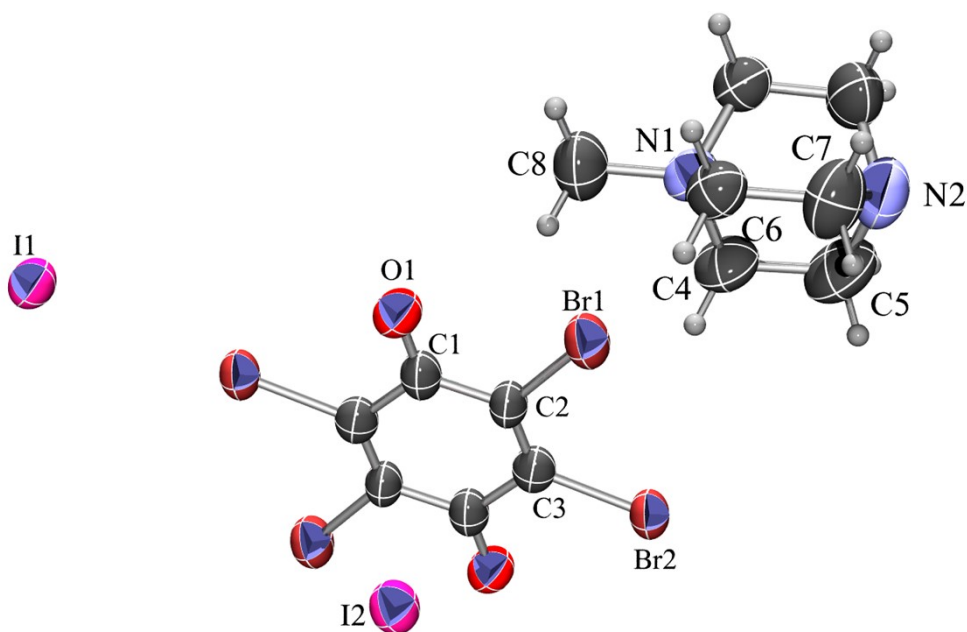

**Figure S5** ORTEP drawing of asymmetric unit of **5** with the atom numbering scheme. Displacement ellipsoids are drawn for the probability of 50% and hydrogen atoms are shown as spheres of arbitrary radii.

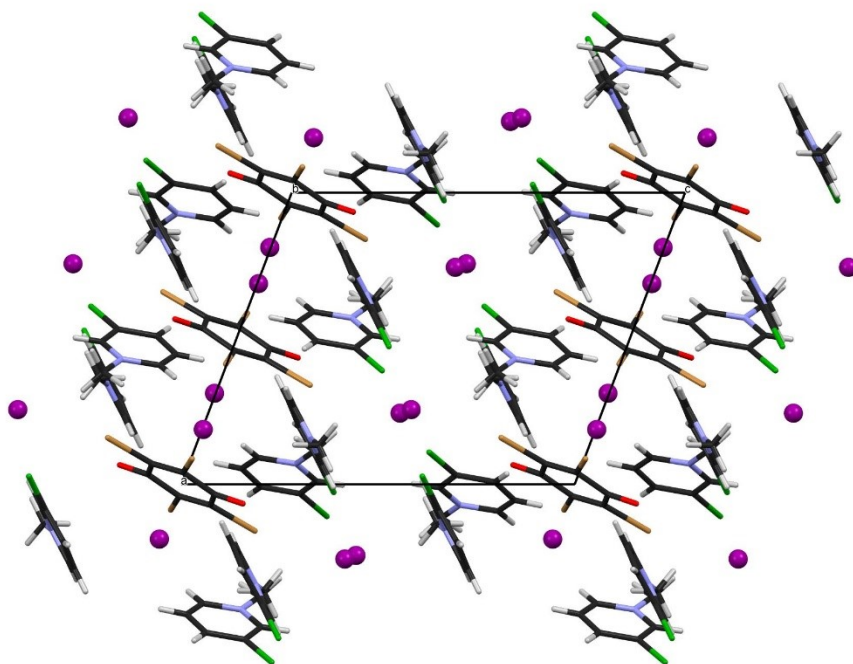

**Figure S6** Crystal packing of **1**. Iodide ions are shown as spheres of arbitrary radii.

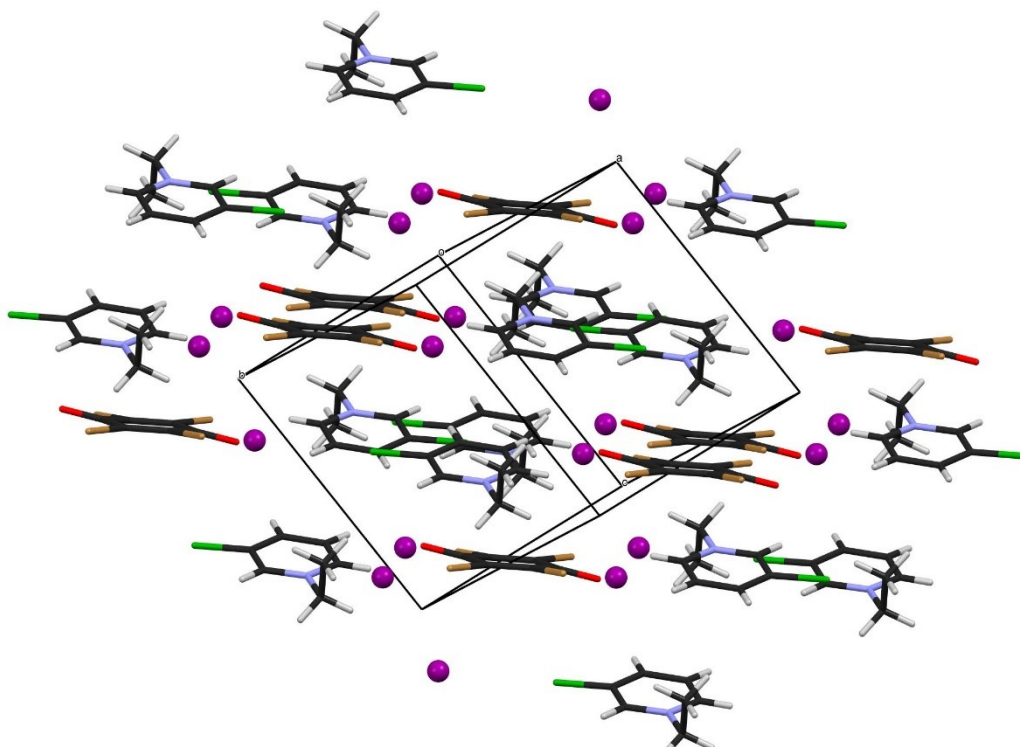

**Figure S7** Crystal packing of **2**. Iodide ions are shown as spheres of arbitrary radii.

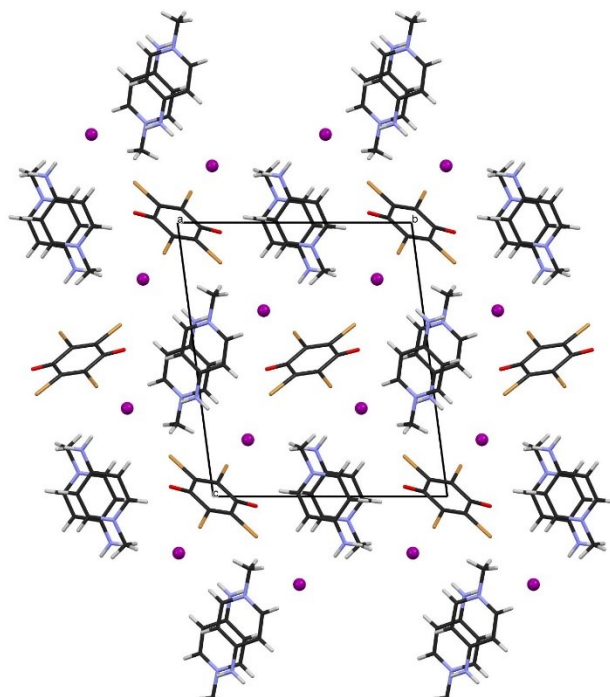

**Figure S8** Crystal packing of **3**. Iodide ions are shown as spheres of arbitrary radii.

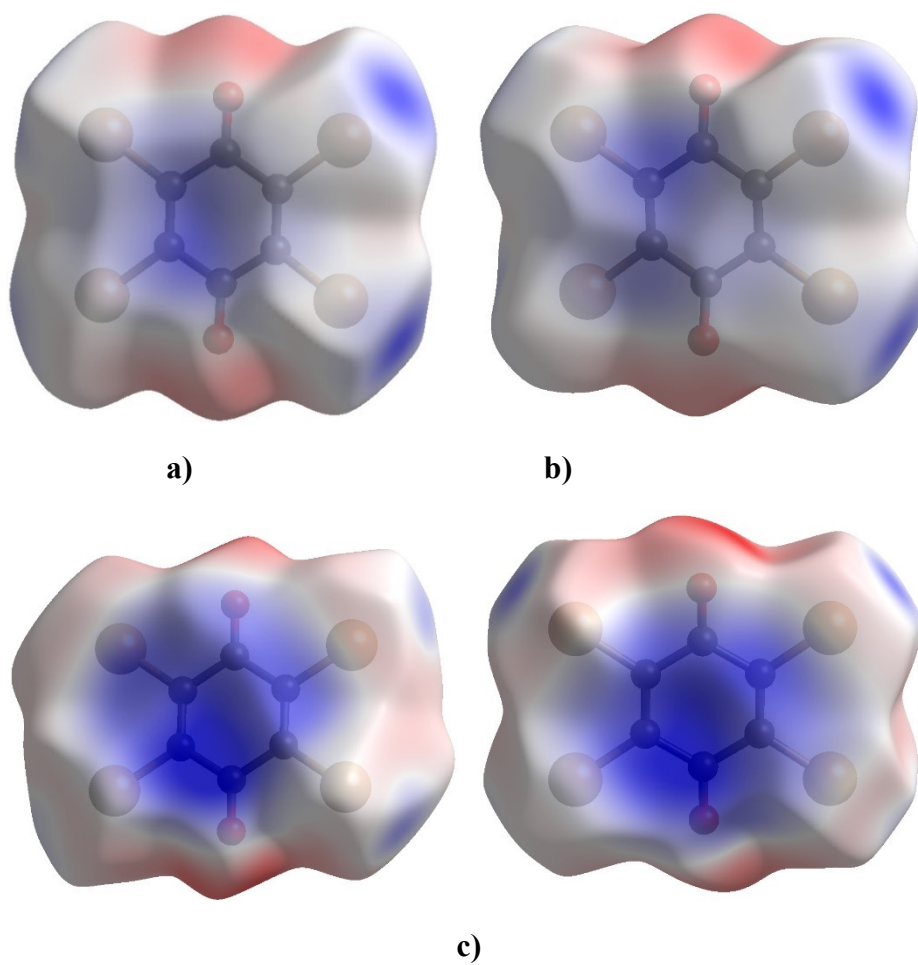

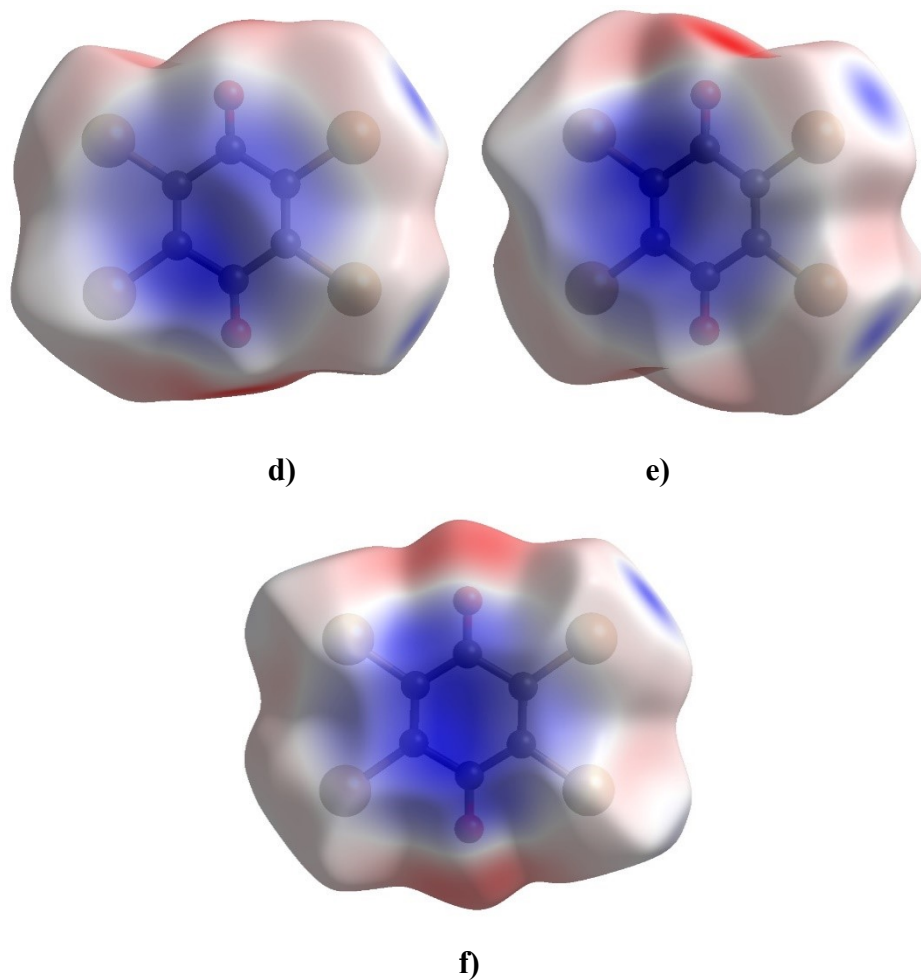

**Figure S9** The electrostatic potential plotted onto a Hirshfeld surface of Br<sub>4</sub>Q for a) **1**, b) **2**, c) two symmetry-independent quinones in **3**, d) **4** at 100 K, e) **4** at RT and f) **5**.

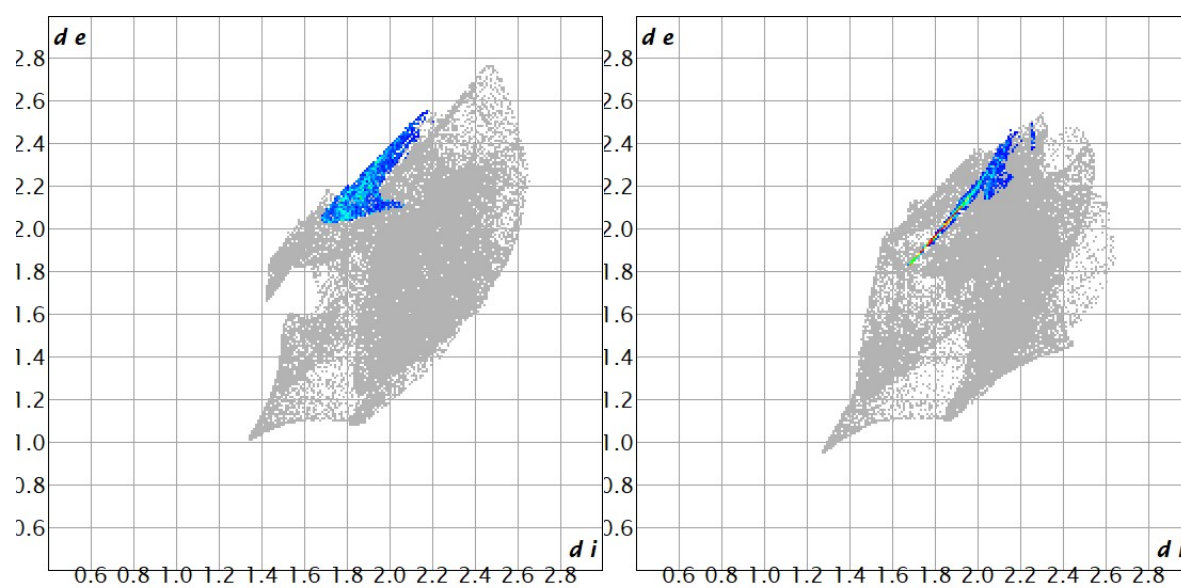

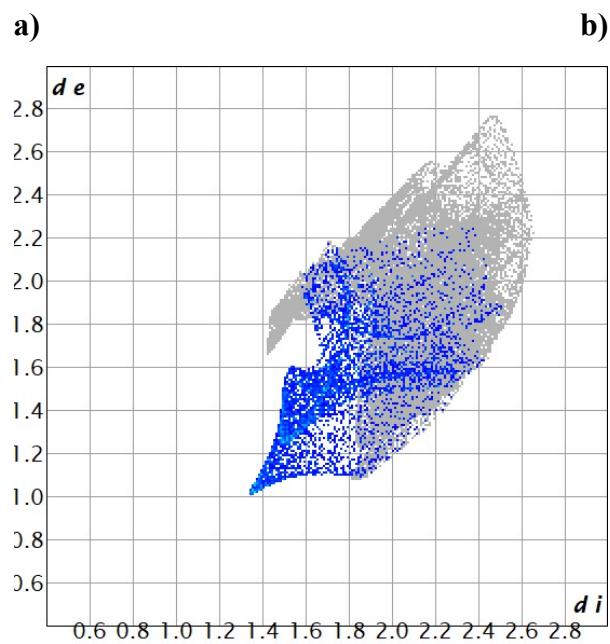

c)

**Figure S10** Fingerprint plots of intermolecular contacts in **1** for a) C...I, b) Br...I and c) O...H.

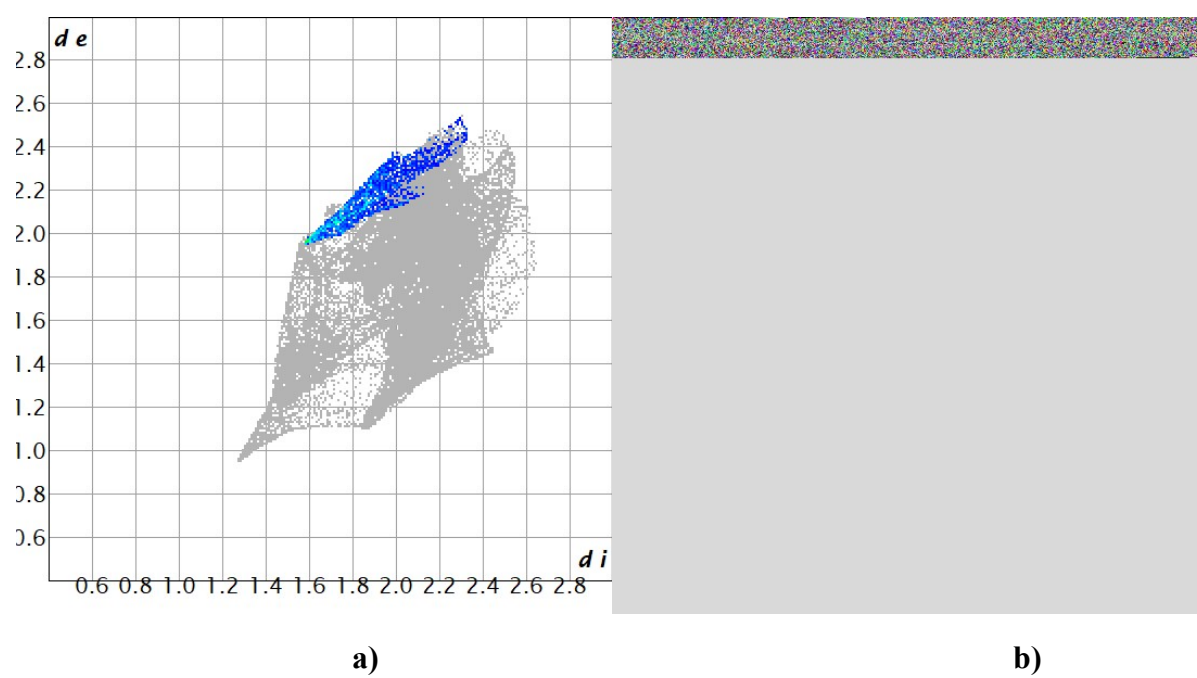

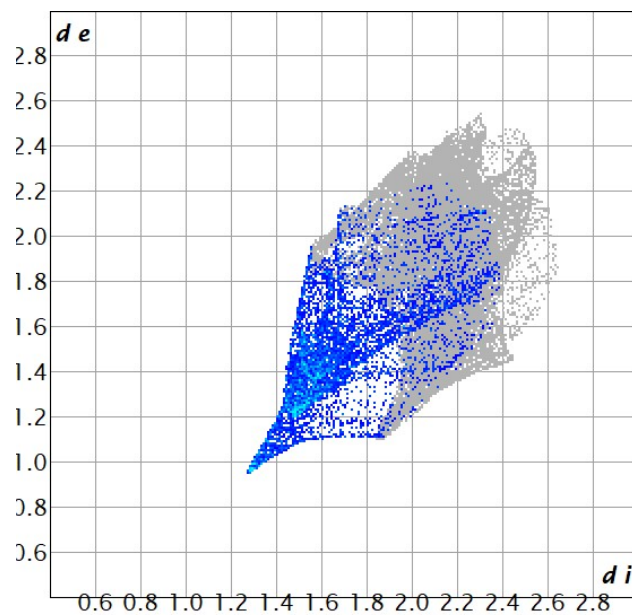

c)

**Figure S11** Fingerprint plots of intermolecular contacts in **2** for a) C...I, b) Br...I and c) O...H.

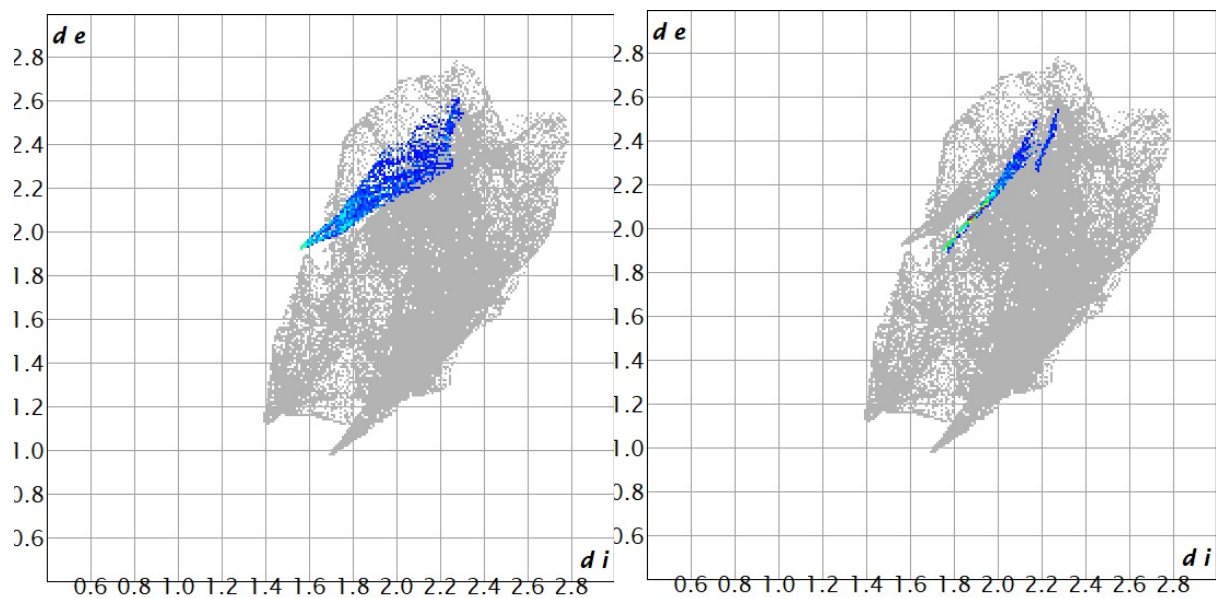

a)

b)



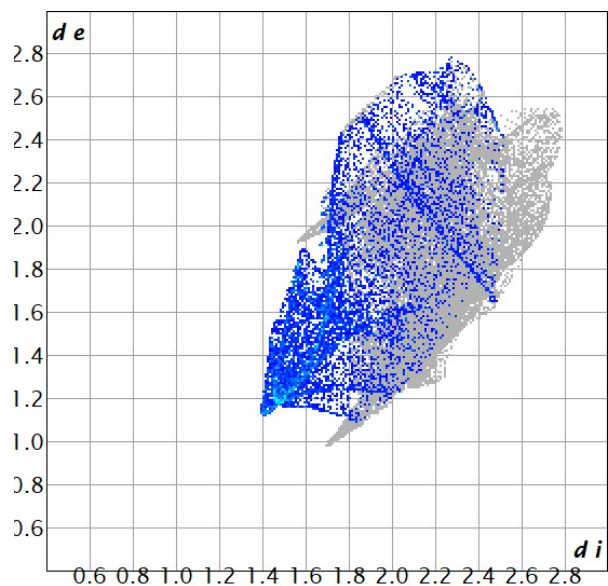

c)

**Figure S12** Fingerprint plots of intermolecular contacts in **3** (molecule 1) for a) C...I, b) Br...I and c) O...H.

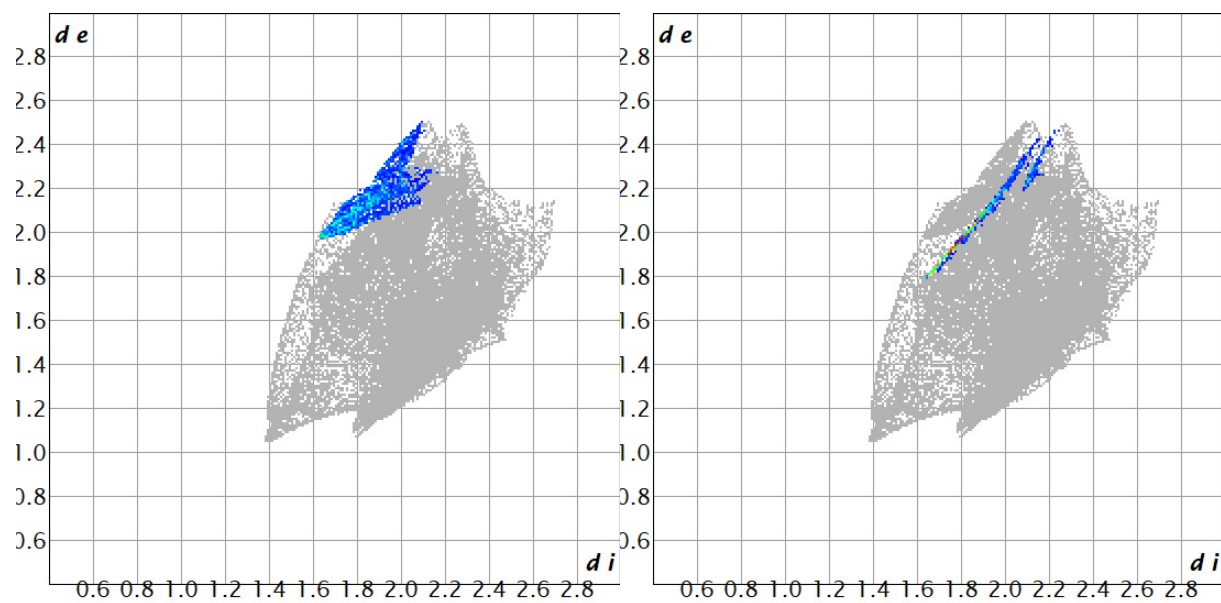

a)

b)

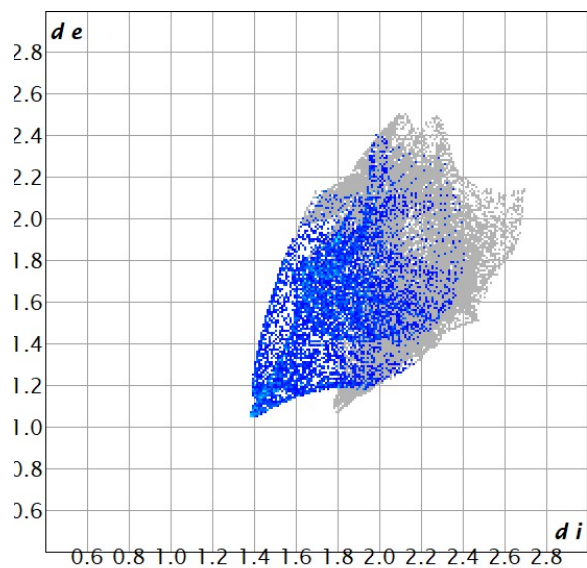

c)

**Figure S13** Fingerprint plots of intermolecular contacts in **3** (molecule 2) for a) C...I, b) Br...I and c) O...H.

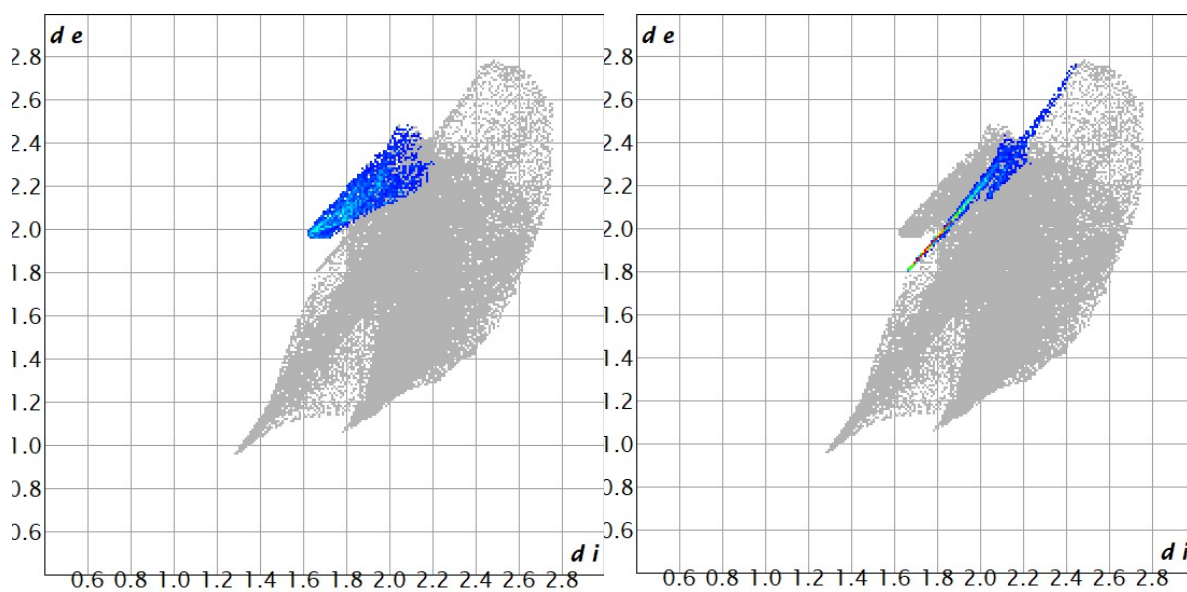

a)

b)

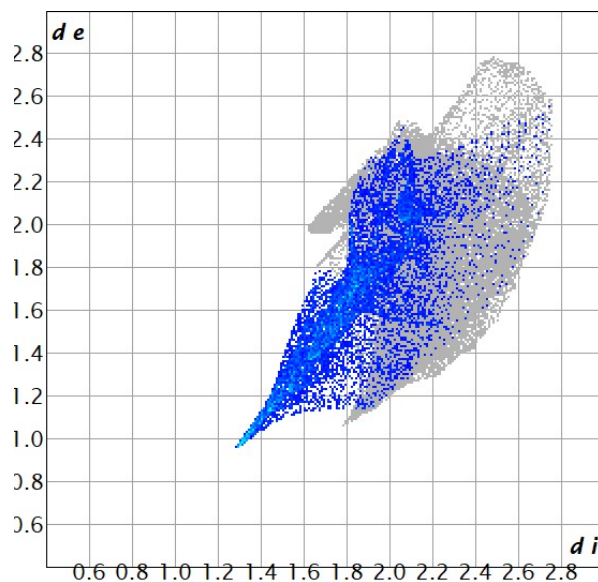

c)

**Figure S14** Fingerprint plots of intermolecular contacts in **4** (at 100 K) for a) C...I, b) Br...I and c) O...H.

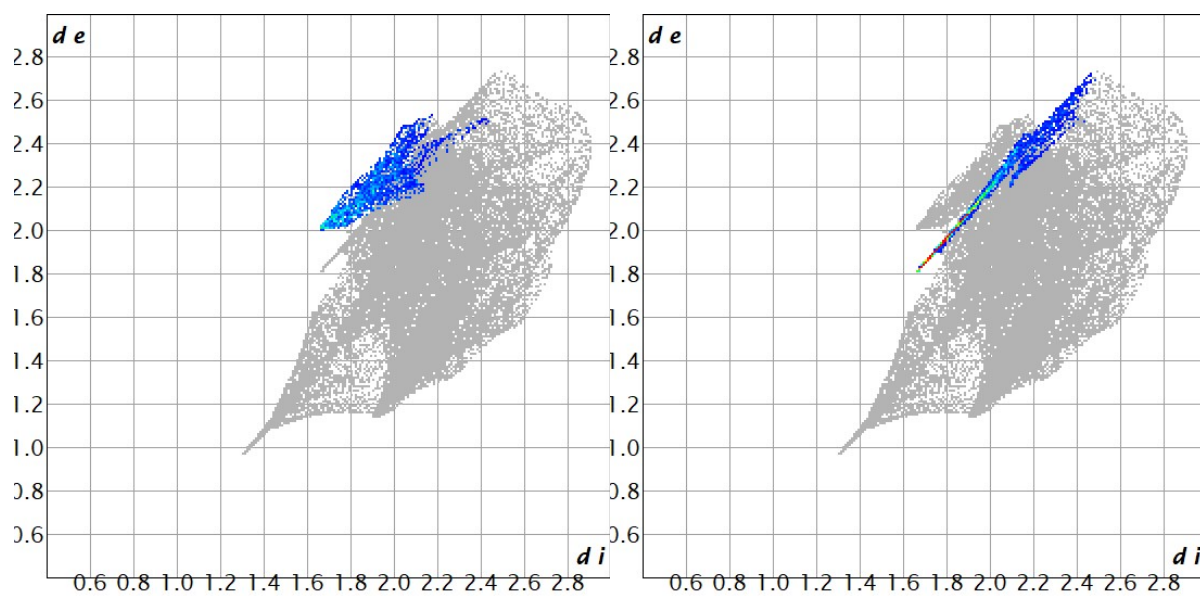

a)

b)

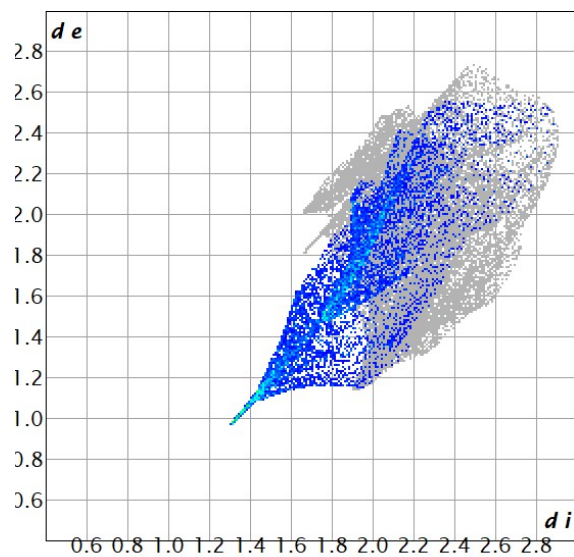

c)

**Figure S15** Fingerprint plots of intermolecular contacts in **4** (at RT) for a) C...I, b) Br...I and c) O...H.

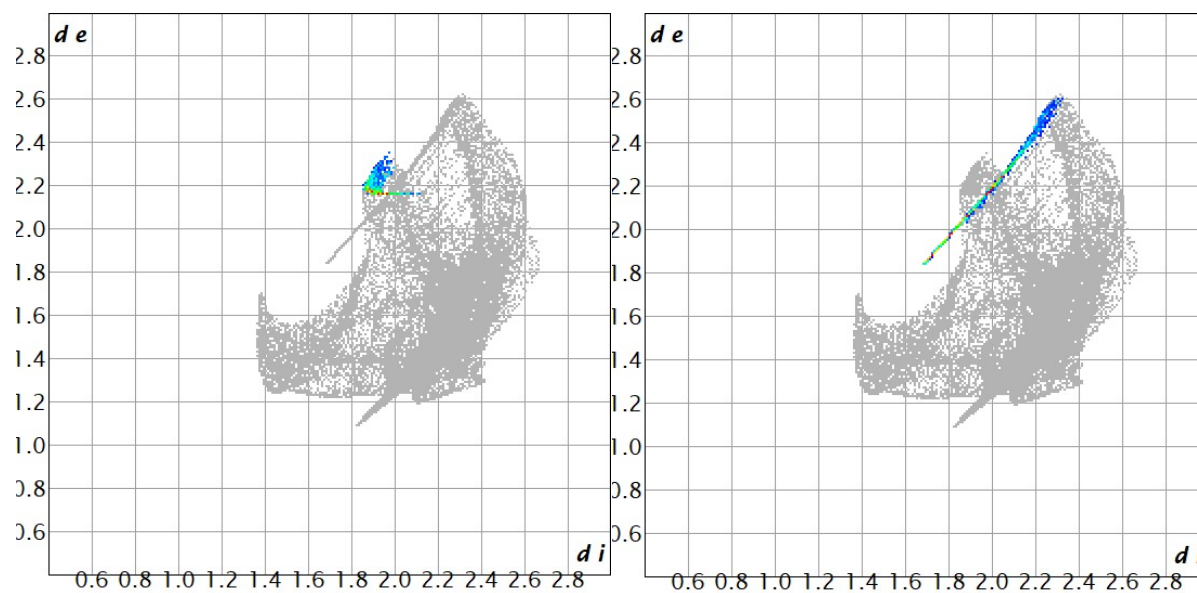

a)

b)

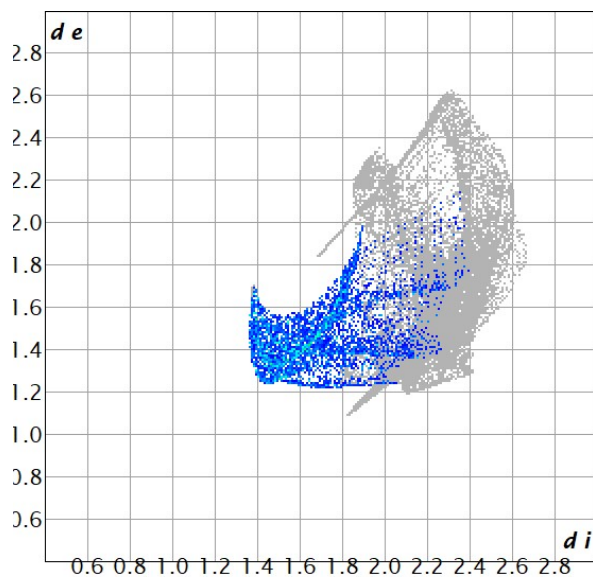

c)

**Figure S16** Fingerprint plots of intermolecular contacts in **5** for a) C...I, b) Br...I and c) O...H.

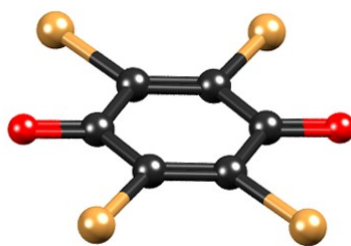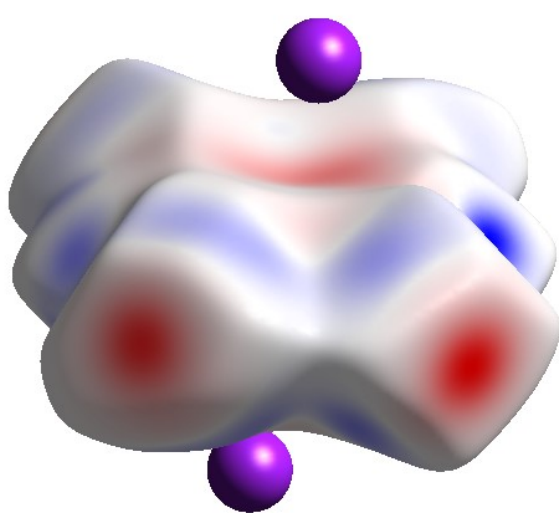

a)

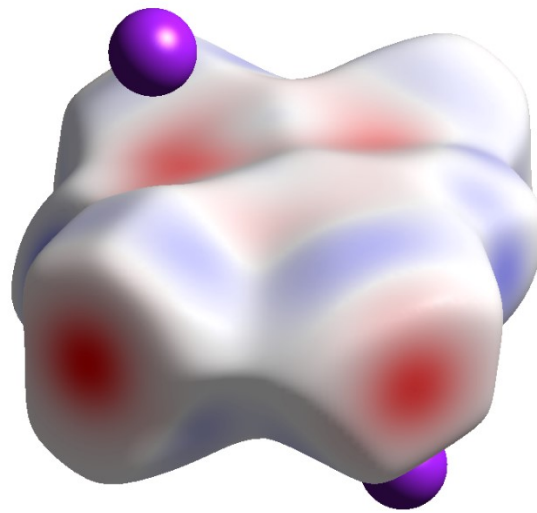

b)

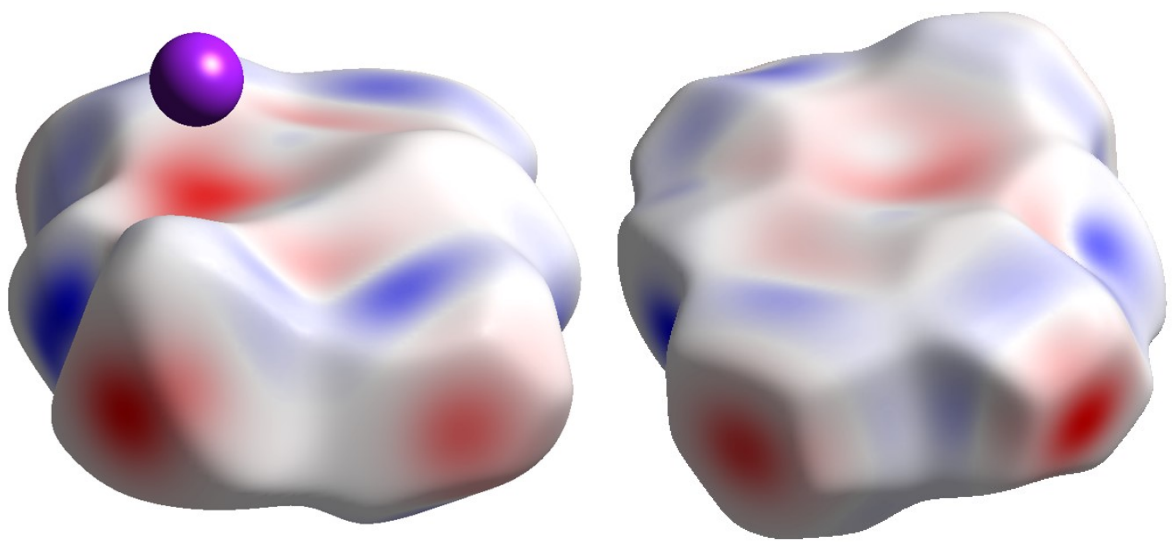

c)

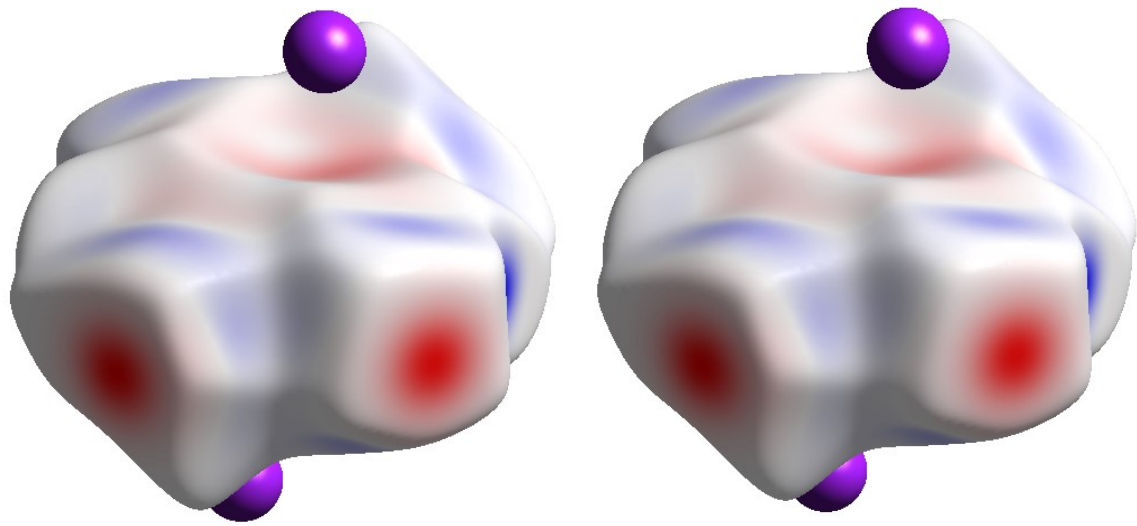

d)

e)

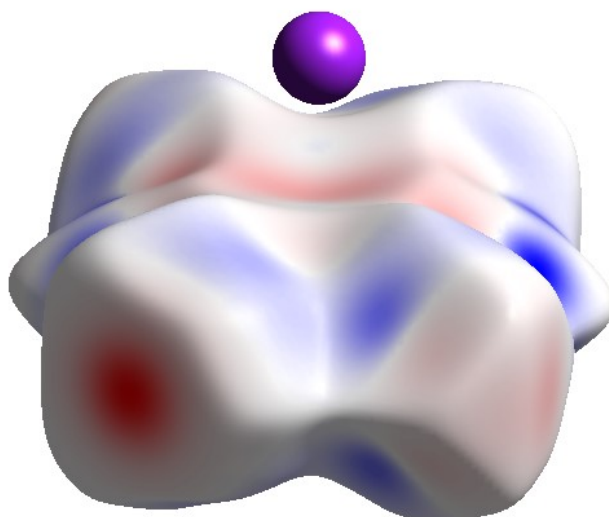

f)

**Figure S17** Theoretical deformation electron density (computed by B3LYP/6-31G(d,p) method) plotted onto a Hirshfeld surface of Br<sub>4</sub>Q for a) **1**, b) **2**, c) two symmetry-independent quinones in **3**, d) **4** at 100 K, e) **4** at RT and f) **5**. Positive density is shown in blue, and negative is red. Approximate orientation of the Br<sub>4</sub>Q molecule is shown at the top.

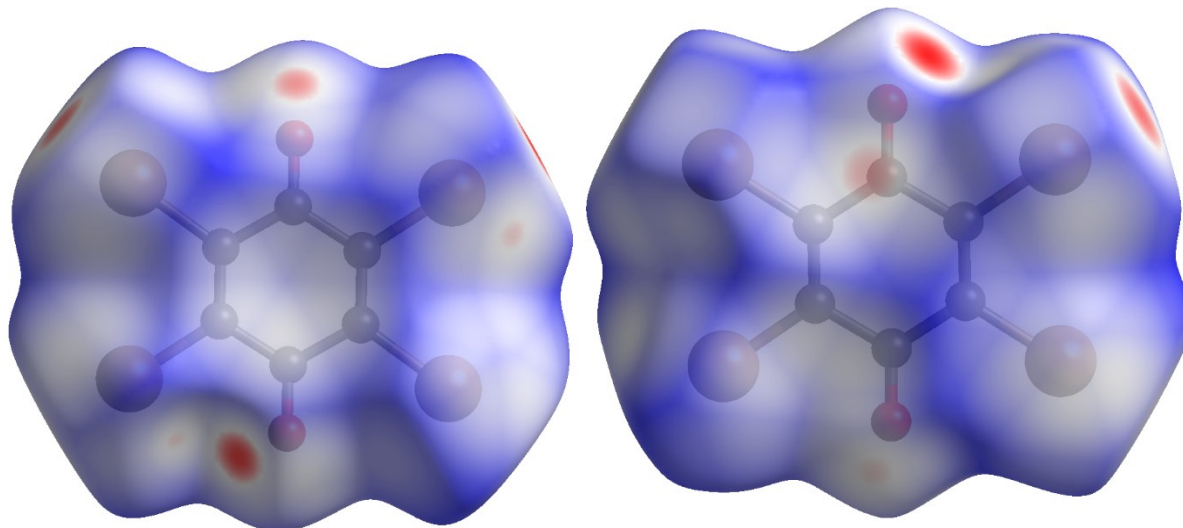

a)

b)

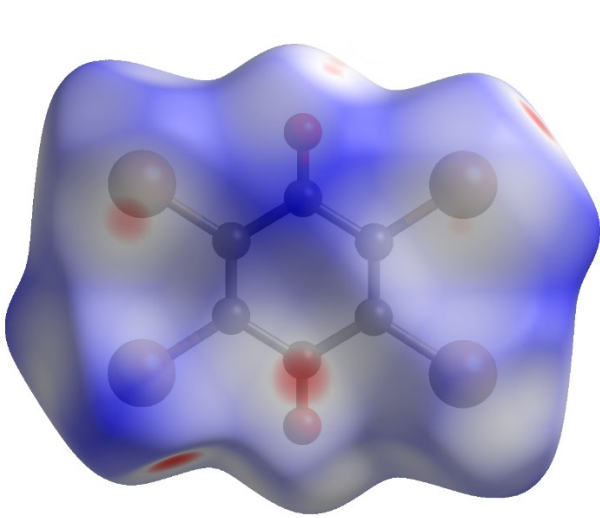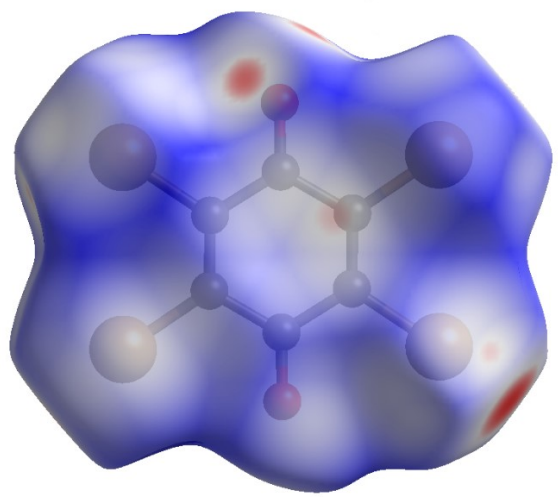

c)

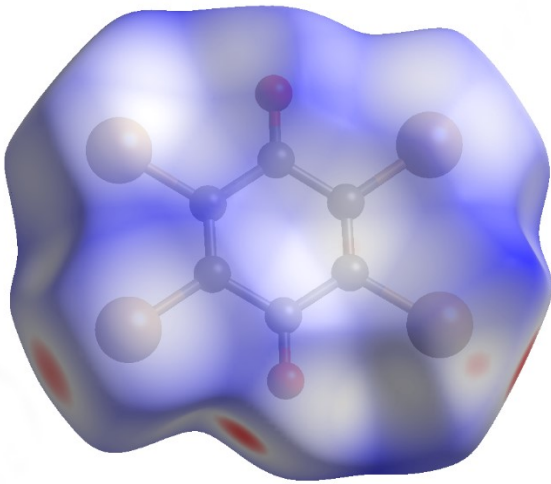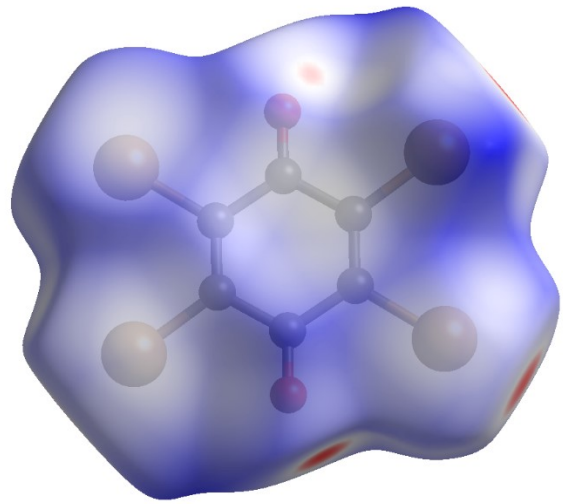

d)

e)

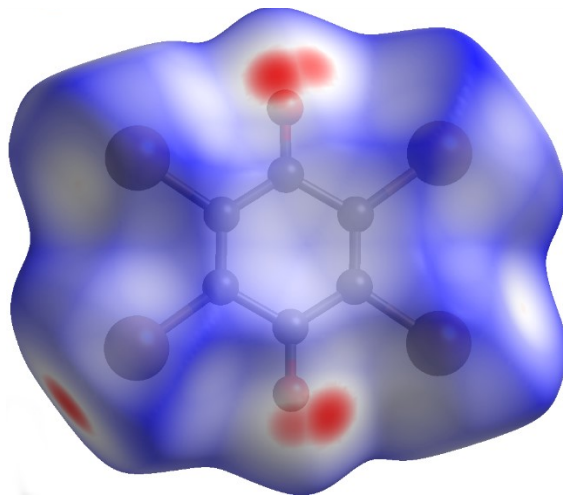

f)



**Figure S18** Normalised distance ( $d_{\text{norm}}$ ) plotted onto a Hirshfeld surface of Br<sub>4</sub>Q for a) **1**, b) **2**, c) two symmetry-independent quinones in **3**, d) **4** at 100 K, e) **4** at RT and f) **5**. Red colour represents close contacts, while the more distant ones are shown in blue.

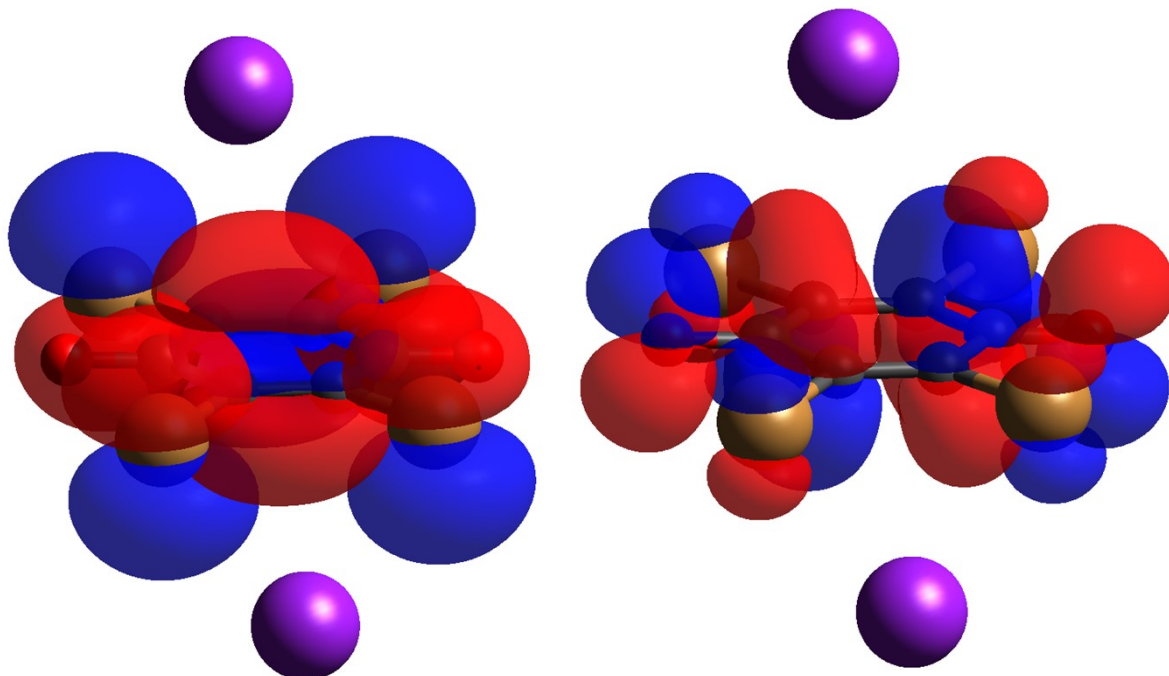

**Figure S19** HOMO (left) and LUMO (right) orbitals of Br<sub>4</sub>Q moiety in **1**. The orbitals were calculated using B3LYP method with 6-31G(d,p) basis set.

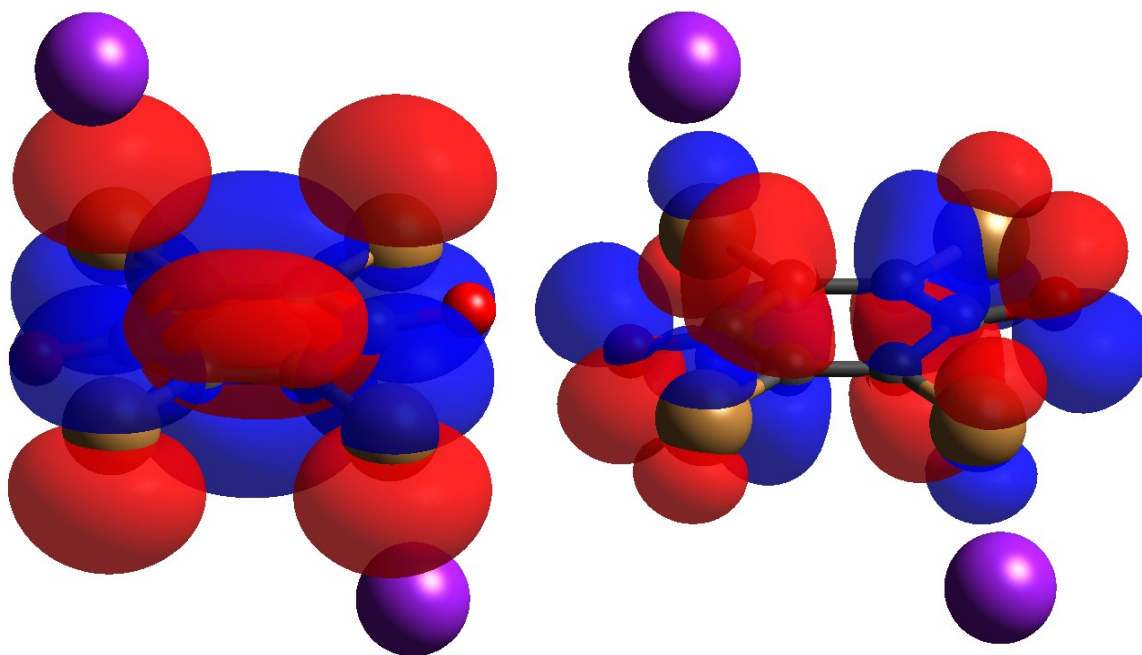

**Figure S20** HOMO (left) and LUMO (right) orbitals of Br<sub>4</sub>Q moiety in **2**. The orbitals were calculated using B3LYP method with 6-31G(d,p) basis set.

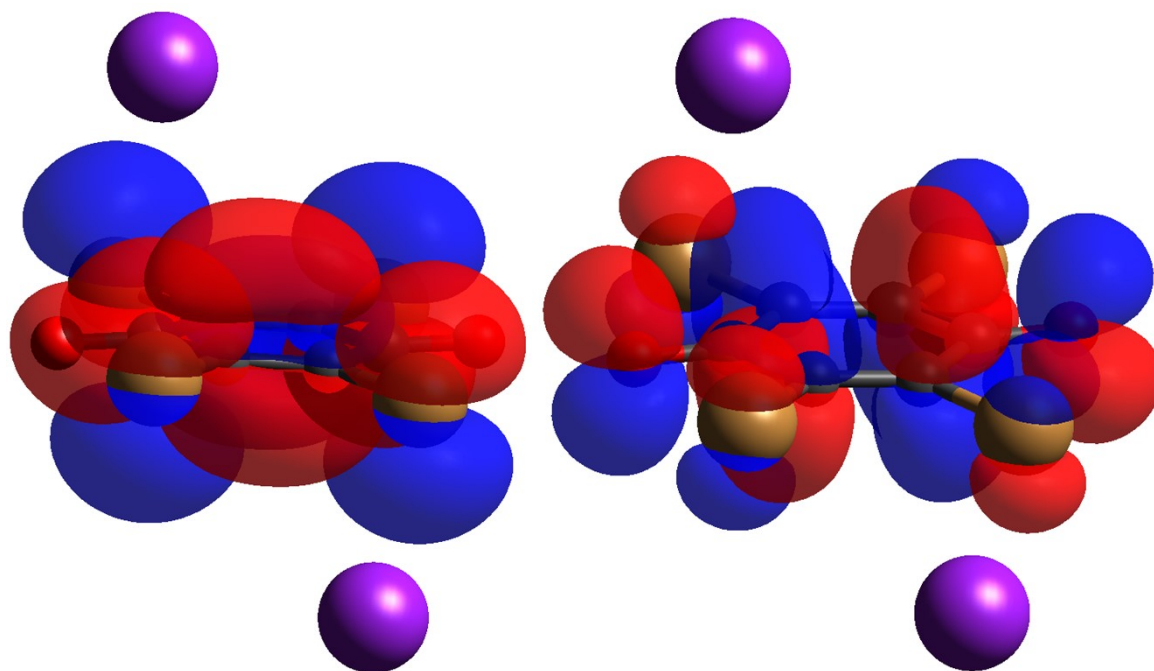

a)

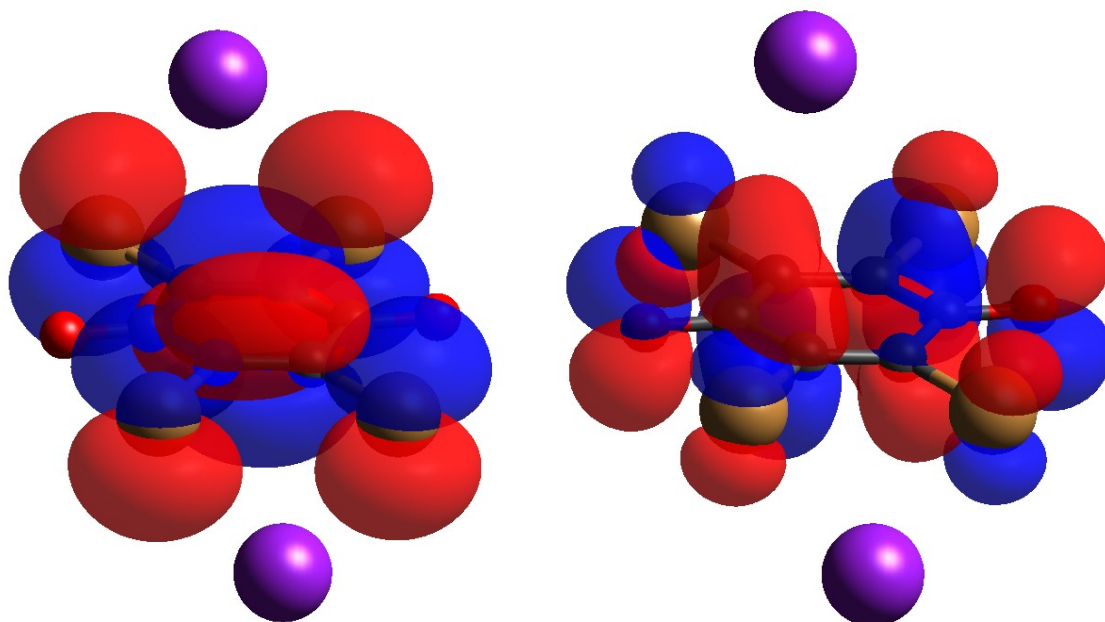

b)

**Figure S21** HOMO (left) and LUMO (right) orbitals of Br<sub>4</sub>Q moieties a) 1 and b) 2 in **3**. The orbitals were calculated using B3LYP method with 6-31G(d,p) basis set.

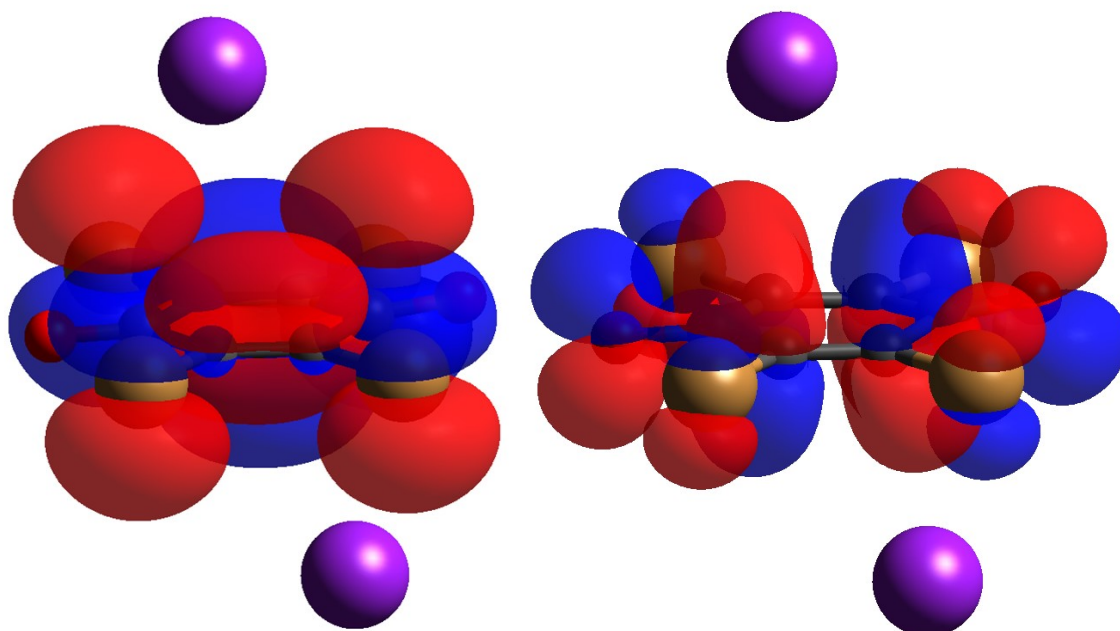

**Figure S22** HOMO (left) and LUMO (right) orbitals of Br<sub>4</sub>Q moiety in **4** at 100 K. The orbitals were calculated using B3LYP method with 6-31G(d,p) basis set.

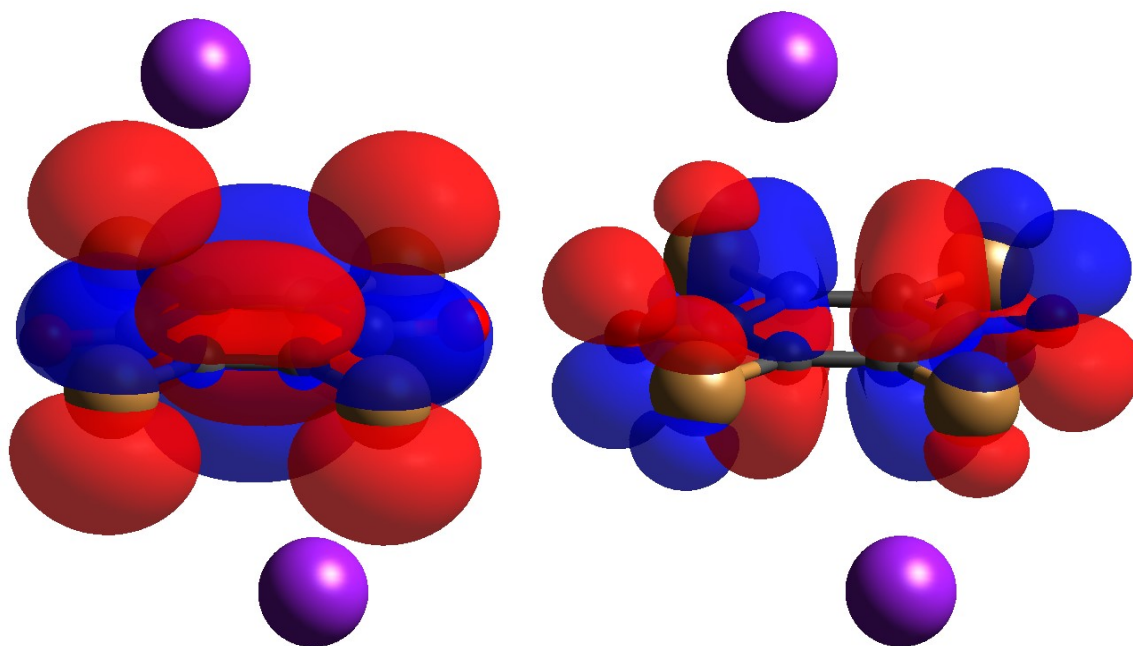

**Figure S23** HOMO (left) and LUMO (right) orbitals of Br<sub>4</sub>Q moiety in **4** at room temperature. The orbitals were calculated using B3LYP method with 6-31G(d,p) basis set.

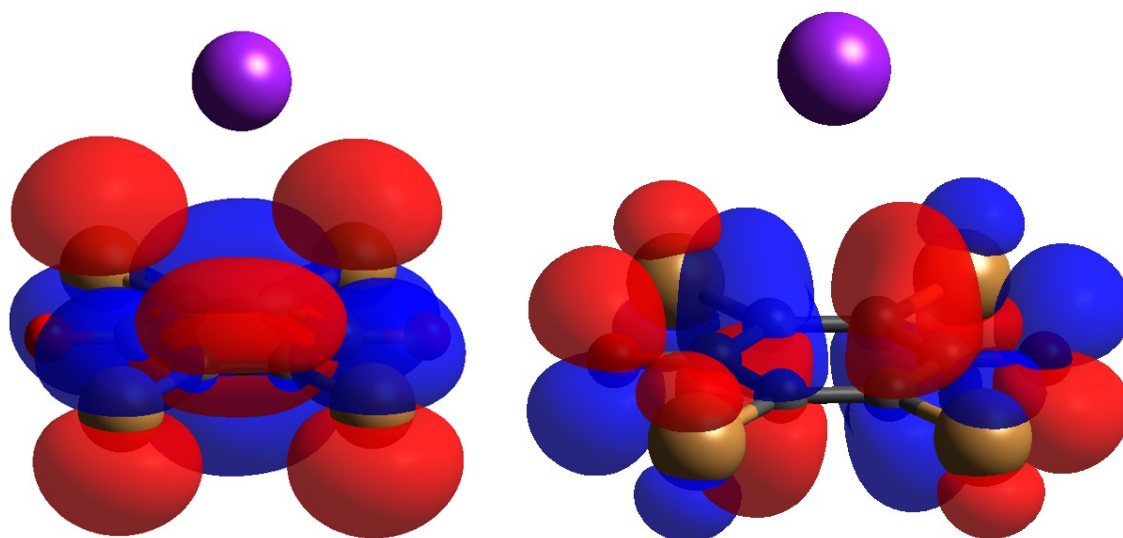

**Figure S24** HOMO (left) and LUMO (right) orbitals of Br<sub>4</sub>Q moiety in **5**. The orbitals were calculated using B3LYP method with 6-31G(d,p) basis set.

**Table S1** Geometric parameters of hydrogen bonds (Å, °).

|                      | $D-H / \text{\AA}$ | $H \cdots A / \text{\AA}$ | $D \cdots A / \text{\AA}$ | $D-H \cdots A / ^\circ$ | Symm. op. on $A$      |
|----------------------|--------------------|---------------------------|---------------------------|-------------------------|-----------------------|
| <b>1</b>             |                    |                           |                           |                         |                       |
| C4-H4 $\cdots$ I2    | 0.93               | 2.35                      | 3.617(9)                  | 119                     | $1-x, 1-y, 1-z$       |
| C9-H9B $\cdots$ I2   | 0.96               | 3.17                      | 3.961(8)                  | 140                     | $3/2-x, -1/2+y, 1-z$  |
| C9-H9C $\cdots$ I2   | 0.96               | 3.09                      | 3.922(9)                  | 146                     | $1-x, 1-y, 1-z$       |
| C10-H10 $\cdots$ I2  | 0.93               | 2.98                      | 3.886(8)                  | 164                     | $3/2-x, -1/2+y, 1-z$  |
| C14-H14 $\cdots$ O1  | 0.93               | 2.49                      | 3.310(12)                 | 147                     | $5/2-x, -1/2+y, 1-z$  |
| C15-H15A $\cdots$ I2 | 0.96               | 3.22                      | 4.132(9)                  | 159                     | $3/2-x, -1/2+y, -z$   |
| C15-H15B $\cdots$ O1 | 0.96               | 2.79                      | 3.304(11)                 | 114                     | $5/2-x, -1/2+y, 1-z$  |
| <b>2</b>             |                    |                           |                           |                         |                       |
| C4-H4 $\cdots$ I1    | 0.93               | 3.00                      | 3.636(11)                 | 127                     | $1-x, 1-y, 1-z$       |
| C7-H7 $\cdots$ I1    | 0.93               | 3.05                      | 3.906(14)                 | 154                     | $1-x, -y, 1-z$        |
| C8-H8 $\cdots$ O1    | 0.93               | 2.35                      | 3.118(15)                 | 140                     | $2+x, y, 1+z$         |
| C9-H9A $\cdots$ O1   | 0.96               | 2.97                      | 3.479(15)                 | 114                     | $2+x, y, 1+z$         |
| C9-H9A $\cdots$ I1   | 0.96               | 3.25                      | 4.205(11)                 | 171                     | $1+x, y, 1+z$         |
| C9-H9B $\cdots$ Br2  | 0.96               | 3.07                      | 3.925(12)                 | 147                     | $1-x, 1-y, 1-z$       |
| C10-H10B $\cdots$ O1 | 0.96               | 2.76                      | 3.457(15)                 | 130                     | $2+x, y, 1+z$         |
| <b>3</b>             |                    |                           |                           |                         |                       |
| N2-H2A $\cdots$ I1   | 0.86               | 3.03                      | 3.860(5)                  | 163                     | $x, y, z$             |
| N2-H2B $\cdots$ I2   | 0.86               | 3.02                      | 3.856(5)                  | 166                     | $-1+x, y, z$          |
| N4-H4A $\cdots$ I1   | 0.86               | 2.79                      | 3.635(5)                  | 167                     | $x, y, z$             |
| N4-H4B $\cdots$ I2   | 0.86               | 2.85                      | 3.666(6)                  | 159                     | $-1+x, y, z$          |
| C10-H10 $\cdots$ O1  | 0.93               | 2.61                      | 3.194(7)                  | 121                     | $1-x, 1-y, 1-z$       |
| C11-H11 $\cdots$ O1  | 0.93               | 2.72                      | 3.261(6)                  | 118                     | $1-x, 1-y, 1-z$       |
| C11-H11 $\cdots$ Br1 | 0.93               | 2.81                      | 3.601(6)                  | 144                     | $1-x, 1-y, 1-z$       |
| C14-H14 $\cdots$ O2  | 0.93               | 2.56                      | 3.354(7)                  | 144                     | $1-x, 1-y, 2-z$       |
| C17-H17 $\cdots$ O2  | 0.93               | 2.61                      | 3.084(7)                  | 112                     | $x, y, z$             |
| <b>4, 100 K</b>      |                    |                           |                           |                         |                       |
| C7-H7 $\cdots$ I1    | 0.93               | 3.20                      | 3.727(10)                 | 118                     | $1-x, -1/2+y, 3/2-z$  |
| C8-H8 $\cdots$ O1    | 0.93               | 2.42                      | 3.248(11)                 | 149                     | $x, 1/2-y, -1/2+z$    |
| C9-H9 $\cdots$ I1    | 0.93               | 3.06                      | 3.981(10)                 | 170                     | $x, 1/2-y, -1/2+z$    |
| C11-H12B $\cdots$ I2 | 0.93               | 3.12                      | 3.860(13)                 | 138                     | $-1+x, 3/2-y, -1/2+z$ |
| C12-H12B $\cdots$ I1 | 0.96               | 3.25                      | 4.044(11)                 | 141                     | $1-x, -1/2+y, 3/2-z$  |
| C12-H12C $\cdots$ O1 | 0.96               | 2.65                      | 3.284(12)                 | 124                     | $1-x, 1-y, 2-z$       |
| C14-H14 $\cdots$ I2  | 0.93               | 3.19                      | 3.925(13)                 | 137                     | $-1+x, -1+y, z$       |
| C16-H16 $\cdots$ O2  | 0.93               | 2.39                      | 3.249(18)                 | 153                     | $-1+x, -1+y, z$       |
| <b>4, RT</b>         |                    |                           |                           |                         |                       |
| C4-H4 $\cdots$ I1    | 0.94               | 3.06                      | 3.926(13)                 | 155                     | $-x, 1-y, 1-z$        |
| C6-H6 $\cdots$ I1    | 0.93               | 3.00                      | 3.905(17)                 | 164                     | $x, y, z$             |
| C7-H7 $\cdots$ O1    | 0.93               | 2.44                      | 3.36(2)                   | 169                     | $1-x, 1-y, 1-z$       |
| C9-H9B $\cdots$ O1   | 0.96               | 2.61                      | 3.367(18)                 | 135                     | $x, 3/2-y, 1/2+z$     |
| <b>5</b>             |                    |                           |                           |                         |                       |
| C6-H6A $\cdots$ O1   | 0.96               | 2.92                      | 3.060(16)                 | 90                      | $1-x, 1-y, -z$        |
| C6-H6B $\cdots$ O1   | 0.96               | 2.80                      | 3.060(16)                 | 96                      | $1-x, 1-y, -z$        |
| C7-H7A $\cdots$ O1   | 0.96               | 2.69                      | 2.963(17)                 | 97                      | $1-x, 1-y, -1+z$      |
| C7-H7B $\cdots$ O1   | 0.96               | 2.76                      | 2.963(17)                 | 92                      | $1-x, 1-y, -1+z$      |
| C7-H7B $\cdots$ I2   | 0.96               | 3.23                      | 4.065(12)                 | 145                     | $1+x, y, z$           |

**Table S2** Geometric parameters of  $\pi$  interactions in **3**.

| $\pi \cdots \pi$                                      | Cg <sup>a</sup> $\cdots$ C<br>g / Å | $\alpha^b$ | $\beta^c$ | Cg $\cdots$ plane(Cg2<br>) / Å | Offse<br>t/ Å | Symm. op.<br>on Cg2 |
|-------------------------------------------------------|-------------------------------------|------------|-----------|--------------------------------|---------------|---------------------|
| N1 $\rightarrow$ C11 $\cdots$ N1 $\rightarrow$<br>C11 | 3.374(4)                            | 0.0<br>(3) | 1<br>5.7  | 3.176(3)                       | 0.916         | 1-x, -y, 1-z        |
| N3 $\rightarrow$ C17 $\cdots$ N3 $\rightarrow$<br>C17 | 3.556(4)                            | 0.0<br>(3) | 1<br>3.0  | 3.465(3)                       | 0.800         | 2-x, -y, 1-z        |
| N3 $\rightarrow$ C17 $\cdots$ N3 $\rightarrow$<br>C17 | 3.643(4)                            | 0.0<br>(3) | 2<br>1.8  | 3.382(3)                       | 1.354         | 1-x, 1-y,<br>2-z    |

<sup>a</sup> Cg = centre of gravity of the aromatic ring.

<sup>b</sup>  $\alpha$  = angle between planes of two interacting rings.

<sup>c</sup>  $\beta$  = angle between Cg $\cdots$ Cg line and normal to the plane of the first interacting ring.

### Crystal packing of compounds **2** - **4**

3D packing of **2** is achieved by insertion of cations between I1 $\cdots$ Br<sub>4</sub>Q $\cdots$ I1 units (Fig. S25); there are three symmetry-independent halogen and seven hydrogen bonds (Tables 3 and S1).

In **3** planar cations form infinite stacks (Table S2) extending in the direction [100], and the I $\cdots$ quinone $\cdots$ I $\cdots$  groups are located between these stacks (Fig. S26). There are two symmetry-independent stacks of cations and I $\cdots$ quinone $\cdots$ I $\cdots$  groups. Due to the presence of strong proton-donating amino groups, hydrogen bonding is more extensive than in other structures. There are four symmetry-independent N-H $\cdots$ I hydrogen bonds, four C-H $\cdots$ O and one C-H $\cdots$ Br (Table S1); in addition, four C-Br $\cdots$ I halogen bonds link the I $\cdots$ quinone $\cdots$ I $\cdots$  "sandwiches" (Table 3).

Crystal packing of two phases of **4** is the same, although in the low-temperature polymorph there is obviously lower symmetry (Fig. S27): cations are inserted between I $\cdots$ quinone $\cdots$ I $\cdots$  units. Iodide anions accept two C-Br $\cdots$ I halogen bonds (Table 3), and there are weak hydrogen bonds with carbonyl oxygen atoms and iodide anions (Table S1).

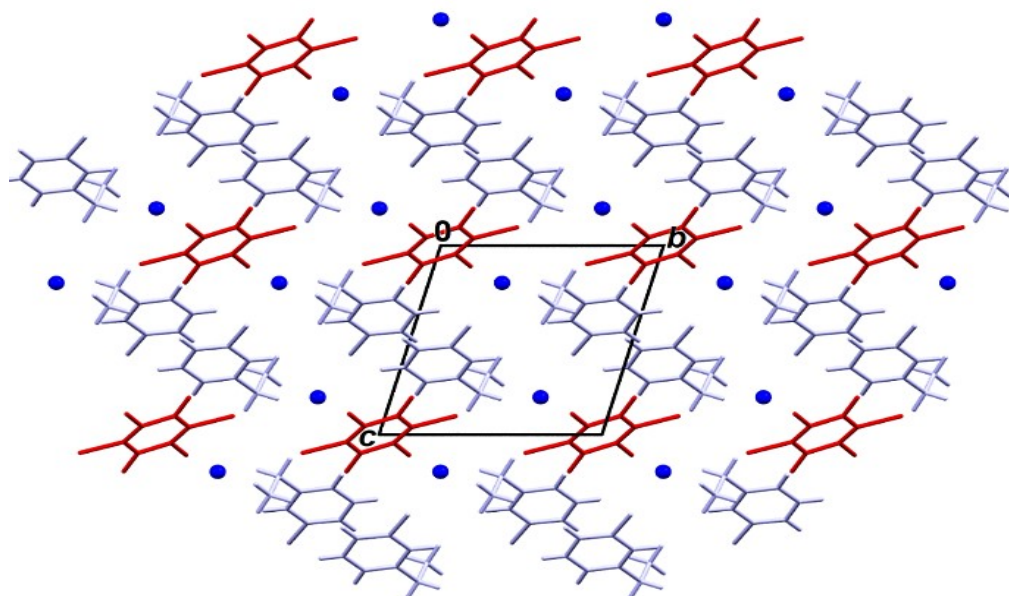

**Figure S25** Crystal packing of **2**. Quinone molecules are shown red, iodide anions as blue and cations as pale purple. Iodide ions are shown as spheres of arbitrary radii.

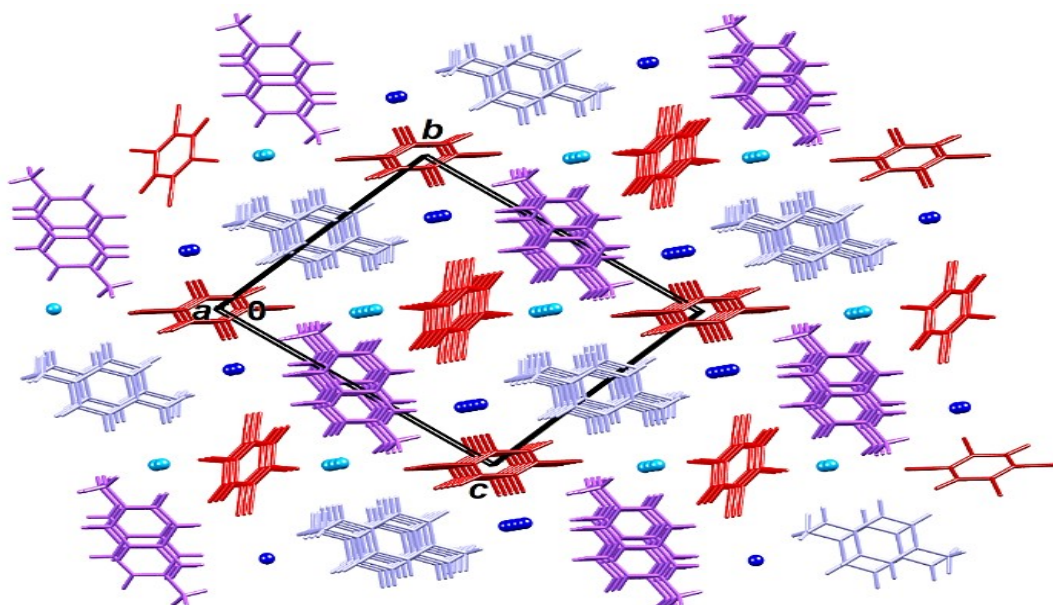

**Figure S26** Crystal packing of **3**. Br<sub>4</sub>Q molecules are shown as red (molecule 1 C1–C3 light red and molecule 2 C4–C6 as dark red), iodide anions are blue (I1 is dark blue, I2 is light blue) and two cations as purple (cation 1 N1–N2 dark purple, cation 2 N3–N4 pale

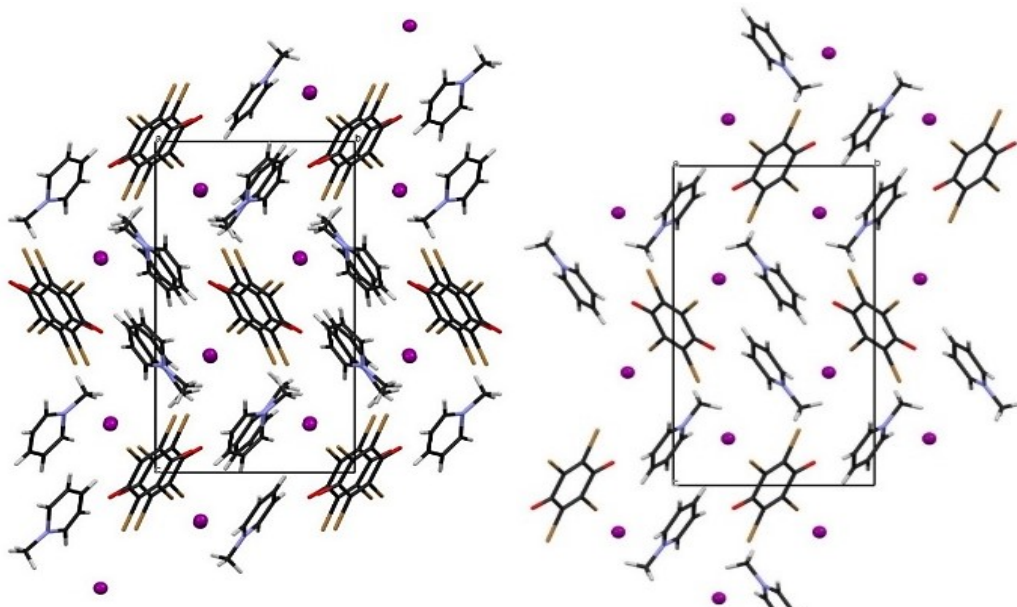

**Figure S27** Crystal packing of **4**. Left: low-temperature phase (100 K), right: high-temperature phase (RT). Iodide ions are shown as spheres of arbitrary radii.



**Table S3** Crystallographic, data collection and refinement data.

| Compound                                          | 1                                                                                                  | 2                                                                                                    | 3                                                                                            | 4                                                                                            | 4                                                                                            | 5                                                                                            |
|---------------------------------------------------|----------------------------------------------------------------------------------------------------|------------------------------------------------------------------------------------------------------|----------------------------------------------------------------------------------------------|----------------------------------------------------------------------------------------------|----------------------------------------------------------------------------------------------|----------------------------------------------------------------------------------------------|
| Empirical formula                                 | C <sub>15</sub> H <sub>14</sub> Br <sub>2</sub> Cl <sub>2</sub> I <sub>2</sub> N <sub>2</sub><br>O | C <sub>20</sub> H <sub>18</sub> Br <sub>4</sub> Cl <sub>2</sub> I <sub>2</sub> N <sub>2</sub> O<br>2 | C <sub>18</sub> H <sub>18</sub> Br <sub>4</sub> I <sub>2</sub> N <sub>4</sub> O <sub>2</sub> | C <sub>18</sub> H <sub>16</sub> Br <sub>4</sub> I <sub>2</sub> N <sub>2</sub> O <sub>2</sub> | C <sub>18</sub> H <sub>16</sub> Br <sub>4</sub> I <sub>2</sub> N <sub>2</sub> O <sub>2</sub> | C <sub>20</sub> H <sub>30</sub> Br <sub>4</sub> I <sub>2</sub> N <sub>4</sub> O <sub>2</sub> |
| Formula wt. / g mol <sup>-1</sup>                 | 722.80                                                                                             | 962.70                                                                                               | 895.76                                                                                       | 865.77                                                                                       | 865.77                                                                                       | 931.88                                                                                       |
| Colour                                            | black                                                                                              | black                                                                                                | black                                                                                        | black                                                                                        | black                                                                                        | black                                                                                        |
| Crystal dimensions / mm                           | 0.15 x 0.15 x 0.15                                                                                 | 0.25 x 0.08 x 0.06                                                                                   | 0.10 x 0.07 x 0.05                                                                           | 0.22 x 0.08 x 0.07                                                                           | 0.18 x 0.08 x 0.07                                                                           | 0.20 x 0.06 x 0.03                                                                           |
| Space group                                       | <i>P</i> 2 <sub>1</sub> / <i>a</i>                                                                 | <i>P</i> $\bar{1}$                                                                                   | <i>P</i> $\bar{1}$                                                                           | <i>P</i> 2 <sub>1</sub> / <i>c</i>                                                           | <i>P</i> 2 <sub>1</sub> / <i>c</i>                                                           | <i>P</i> <i>bam</i>                                                                          |
| <i>a</i> / Å                                      | 10.9816(2)                                                                                         | 8.5741(7)                                                                                            | 7.0570(4)                                                                                    | 15.4807(5)                                                                                   | 7.7730(17)                                                                                   | 13.9401(2)                                                                                   |
| <i>b</i> / Å                                      | 15.6952(2)                                                                                         | 9.1611(7)                                                                                            | 12.6851(6)                                                                                   | 9.1376(4)                                                                                    | 9.519(2)                                                                                     | 13.8771(2)                                                                                   |
| <i>c</i> / Å                                      | 13.8514(2)                                                                                         | 9.2506(7)                                                                                            | 14.8883(9)                                                                                   | 17.3524(5)                                                                                   | 17.246(4)                                                                                    | 7.60550(10)                                                                                  |
| $\alpha$ / °                                      | 90                                                                                                 | 105.323(7)                                                                                           | 80.126(4)                                                                                    | 90                                                                                           | 90                                                                                           | 90                                                                                           |
| $\beta$ / °                                       | 110.729(2)                                                                                         | 94.024(7)                                                                                            | 77.986(5)                                                                                    | 91.217(3)                                                                                    | 91.254(4)                                                                                    | 90                                                                                           |
| $\gamma$ / °                                      | 90                                                                                                 | 95.605(7)                                                                                            | 76.607(5)                                                                                    | 90                                                                                           | 90                                                                                           | 90                                                                                           |
| <i>Z</i>                                          | 4                                                                                                  | 1                                                                                                    | 2                                                                                            | 4                                                                                            | 2                                                                                            | 2                                                                                            |
| <i>V</i> / Å <sup>3</sup>                         | 2232.86(6)                                                                                         | 693.94(10)                                                                                           | 1257.45(13)                                                                                  | 2454.05(15)                                                                                  | 1276.0(5)                                                                                    | 1471.27(4)                                                                                   |
| <i>D</i> <sub>calc</sub> / g cm <sup>-3</sup>     | 2.150                                                                                              | 2.304                                                                                                | 2.366                                                                                        | 2.343                                                                                        | 2.253                                                                                        | 2.103                                                                                        |
| $\lambda$ / Å                                     | 1.54179 (CuK $\alpha$ )                                                                            | 1.54179 (CuK $\alpha$ )                                                                              | 1.54179 (CuK $\alpha$ )                                                                      | 1.54179 (CuK $\alpha$ )                                                                      | 1.54179 (CuK $\alpha$ )                                                                      | 1.54179 (CuK $\alpha$ )                                                                      |
| $\mu$ / mm <sup>-1</sup>                          | 28.571                                                                                             | 26.493                                                                                               | 27.282                                                                                       | 27.902                                                                                       | 26.831                                                                                       | 23.499                                                                                       |
| $\Theta$ range / °                                | 3.41 – 75.99                                                                                       | 4.98 – 76.49                                                                                         | 3.06 – 76.31                                                                                 | 5.10 – 75.89                                                                                 | 5.13 – 756                                                                                   | 4.50 – 76.10                                                                                 |
| <i>T</i> / K                                      | 293(2)                                                                                             | 293(1)                                                                                               | 99(2)                                                                                        | 100(2)                                                                                       | 293(2)                                                                                       | 293(2)                                                                                       |
| Diffractionmeter type                             | Xcalibur Nova                                                                                      | Xcalibur Nova                                                                                        | Xcalibur Nova                                                                                | Xcalibur Nova                                                                                | Xcalibur Nova                                                                                | Xcalibur Nova                                                                                |
| Range of <i>h</i> , <i>k</i> , <i>l</i>           | -11 < <i>h</i> < 13;<br>-19 < <i>k</i> < 17;<br>-15 < <i>l</i> < 17                                | -10 < <i>h</i> < 10;<br>-11 < <i>k</i> < 7;<br>-11 < <i>l</i> < 11                                   | -8 < <i>h</i> < 8;<br>-15 < <i>k</i> < 13;<br>-18 < <i>l</i> < 18                            | -18 < <i>h</i> < 9;<br>-9 < <i>k</i> < 11;<br>-21 < <i>l</i> < 14                            | -9 < <i>h</i> < 9;<br>-11 < <i>k</i> < 10;<br>-14 < <i>l</i> < 20                            | -17 < <i>h</i> < 16;<br>-17 < <i>k</i> < 17;<br>-9 < <i>l</i> < 8                            |
| Reflections collected                             | 11894                                                                                              | 5928                                                                                                 | 11628                                                                                        | 13451                                                                                        | 7004                                                                                         | 13009                                                                                        |
| Independent reflections                           | 4599                                                                                               | 2857                                                                                                 | 5191                                                                                         | 5063                                                                                         | 2525                                                                                         | 1651                                                                                         |
| Observed reflections<br>( <i>I</i> ≥ 2 $\sigma$ ) | 4397                                                                                               | 2632                                                                                                 | 4916                                                                                         | 4451                                                                                         | 2305                                                                                         | 1613                                                                                         |
| Absorption correction                             | Multi-scan                                                                                         | Multi-scan                                                                                           | Multi-scan                                                                                   | Multi-scan                                                                                   | Multi-scan                                                                                   | Multi-scan                                                                                   |
| <i>T</i> <sub>min</sub> , <i>T</i> <sub>max</sub> | 0.3367; 1.0000                                                                                     | 0.0593; 1.0000                                                                                       | 0.3269; 1.0000                                                                               | 0.2052; 1.0000                                                                               | 0.3622; 1.0000                                                                               | 0.1039; 1.0000                                                                               |
| <i>R</i> <sub>int</sub>                           | 0.0306                                                                                             | 0.0573                                                                                               | 0.0499                                                                                       | 0.0544                                                                                       | 0.0328                                                                                       | 0.0471                                                                                       |
| <i>R</i> ( <i>F</i> )                             | 0.0522                                                                                             | 0.0635                                                                                               | 0.0507                                                                                       | 0.0560                                                                                       | 0.0579                                                                                       | 0.0504                                                                                       |
| <i>R</i> <sub>w</sub> ( <i>F</i> <sup>2</sup> )   | 0.1591                                                                                             | 0.1949                                                                                               | 0.1452                                                                                       | 0.1565                                                                                       | 0.1761                                                                                       | 0.1660                                                                                       |
| Goodness of fit                                   | 1.048                                                                                              | 1.099                                                                                                | 0.928                                                                                        | 1.044                                                                                        | 1.037                                                                                        | 1.163                                                                                        |
| H atom treatment                                  | Constrained                                                                                        | Constrained                                                                                          | Constrained                                                                                  | Constrained                                                                                  | Constrained                                                                                  | Constrained                                                                                  |
| No. of parameters                                 | 217                                                                                                | 145                                                                                                  | 273                                                                                          | 94                                                                                           | 127                                                                                          | 94                                                                                           |

---

|                                                                      |               |               |               |               |               |               |
|----------------------------------------------------------------------|---------------|---------------|---------------|---------------|---------------|---------------|
| No. of restraints                                                    | 0             | 0             | 0             | 0             | 0             | 0             |
| $\Delta\rho_{\max}, \Delta\rho_{\min}$ ( $\text{e}\text{\AA}^{-3}$ ) | 2.611; -1.704 | 1.885; -1.931 | 1.635; -3.271 | 2.564; -2.280 | 1.815; -1.214 | 2.700; -0.786 |

---
