# Supplementary material for: Novel co-crystals with π-hole interactions between iodide anions and quinoid rings involving charge transfer
Source: Royal Society of Chemistry journal article supplement (doi:10.1039/d1ce01156a), 2021-01-01
Supplement: d1ce01156a2.pdf [file d1ce01156a2.pdf]

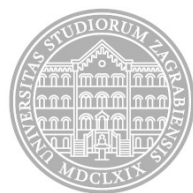

Sveučilište u Zagrebu  
PRIRODOSLOVNO-MATEMATIČKI FAKULTET

Valentina Milašinović

**ISTRAŽIVANJE PRIRODE  $\pi$ -INTERAKCIJA  
NEAROMATSKIH SUSTAVA METODAMA  
ELEKTRONSKE GUSTOĆE I  
KRISTALOGRAFIJE PRI EKSTREMNIM  
UVJETIMA**

DOKTORSKI RAD

Mentor:  
dr. sc. Krešimir Molčanov

Zagreb, 2021.

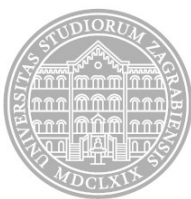

University of Zagreb  
FACULTY OF SCIENCE

Valentina Milašinović

**STUDY OF THE NATURE OF  $\pi$ -  
INTERACTIONS BETWEEN NON-  
AROMATIC SYSTEMS BY X-RAY CHARGE  
DENSITY AND CRYSTALLOGRAPHY  
UNDER EXTREME CONDITIONS**

DOCTORAL DISSERTATION

Supervisor:  
Dr. Krešimir Molčanov

Zagreb, 2021

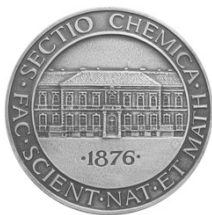

Sveučilište u Zagrebu  
Prirodoslovno-matematički fakultet  
**Kemijski odsjek**

Doktorska disertacija

## SAŽETAK

### ISTRAŽIVANJE PRIRODE $\pi$ -INTERAKCIJA NEAROMATSKIH SUSTAVA METODAMA ELEKTRONSKE GUSTOĆE I KRISTALOGRAFIJE PRI EKSTREMNIM UVJETIMA

Valentina Milašinović

Institut Ruđer Bošković, Bijenička cesta 54, HR-10000 Zagreb, Hrvatska

Glavni cilj doktorske disertacije je detaljno istražiti prirodu  $\pi$ -interakcija nearomatskih prstenova kombinacijom naprednih difrakcijskih metoda. Vrste  $\pi$ -interakcija objašnjene i opisane u ovome radu su multicentrične veze s djelomičnim kovalentnim karakterom između semikinonskih radikala (*palačinka-veze*), te interakcija anion- $\pi$  između kinoidnih prstenova i jodidnih aniona. Priroda  $\pi$ -interakcija nearomatskih prstenova istražena je određivanjem eksperimentalne elektronske gustoće rendgenskom difrakcijom u monokristalu i elektronske gustoće metodom prenošenja multipola, zatim kombinacijom temperaturno ovisne rendgenske difrakcije i rendgenske difrakcije pri visokom tlaku. Analizom elektronske gustoće u tri proučavana semikinonska sustava dokazana je prisutnost multicentrične veze s djelomičnim kovalentnim karakterom, a kontakt jodid $\cdots$ kinon je utvrđen kao elektrostatska interakcija. Visoka temperatura utjecala je na rast parametra jedinične ćelije i udaljenosti među ravninama prstenova, odnosno udaljenosti jodid $\cdots$ kinon. Visoki tlak povećao je kovalentni karakter multicentričnih veza u oba proučavana sustava te uzrokovao fazne pretvorbe.

Disertacija obuhvaća 160 stranica, 79 slika, 42 tablice, 199 literaturnih navoda; izvornik je na hrvatskom jeziku.

Rad je pohranjen u Središnjoj kemijskoj knjižnici, Horvatovac 102a, Zagreb i Nacionalnoj i sveučilišnoj knjižnici, Hrvatske bratske zajednice 4, Zagreb.

Ključne riječi: elektronska gustoća /  $\pi$ -interakcije / kristalografija / multicentrične veze / nearomatski sustavi / visoki tlak

Mentor: dr. sc. Krešimir Molčanov, viši znanstveni suradnik

Rad prihvaćen: 7. travnja 2021.

Ocjenitelji: 1. izv. prof. dr. sc. Marijana Đaković  
2. dr. sc. Marijana Jurić, v. zn. sur.  
3. dr. sc. Jasminka Popović, v. zn. sur.

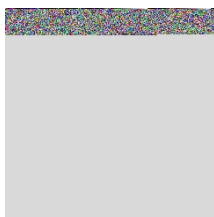

University of Zagreb  
Faculty of Science  
**Department of Chemistry**

Doctoral Thesis

## ABSTRACT

### STUDY OF THE NATURE OF $\pi$ -INTERACTIONS BETWEEN NON-AROMATIC SYSTEMS BY X-RAY CHARGE DENSITY AND CRYSTALLOGRAPHY UNDER EXTREME CONDITIONS

Valentina Milašinović

Ruđer Bošković Institute, Bijenička cesta 54, HR-10000 Zagreb, Croatia

The main goal of the Ph.D. thesis is detailed study of the nature of  $\pi$ -interactions of the non-aromatic rings by a combination of advanced diffraction methods.  $\pi$ -Interactions explained and described in this work are partially covalent multicentric bond between semiquinone radicals (*pancake bonds*) and an anion- $\pi$  interaction between quinone rings and iodide anions. The nature of  $\pi$ -interactions of the non-aromatic systems was investigated by experimental X-ray charge density, X-ray charge density by transferrable aspherical atom model, and high-pressure and variable-temperature single-crystal X-ray diffraction. Charge density analyses were revealed existence of partially covalent multicentric bond in all of three studied semiquinoid systems. Iodide $\cdots$ quinone contact was defined as an electrostatic interaction. The unit-cell parameters, distances between ring planes and iodide $\cdots$ quinone distances were increased with increasing temperature. The covalent component of the multicentric interaction of two studied systems was increased with high pressure and the phase transitions was caused.

Thesis includes 160 pages, 79 figures, 42 tables, 199 references; original in Croatian.

Thesis deposited in Central Chemical Library, Horvatovac 102A, Zagreb, Croatia and National and University Library, Hrvatske bratske zajednice 4, Zagreb, Croatia.

Keywords: charge density / crystallography / high pressure /  $\pi$ -interactions / multicentric bonding / non-aromatic rings

Supervisor: Dr. Krešimir Molčanov, Senior Research Associate

Thesis accepted: April 7<sup>th</sup> 2021

Reviewers: Dr. Marijana Đaković, Associate Professor  
Dr. Marijana Jurić, Senior Research Associate  
Dr. Jasminka Popović, Senior Research Associate

## § 3. EKSPERIMENTALNI DIO

### 3.1. Materijali

Sve korištene kemikalije su čistoće p.a., nabavljene od proizvođača (Merck, Sigma, Kemika) i upotrijebljene bez dodatnog pročišćavanja.

Korišteni su sljedeći kinonski spojevi (prikazani na slikama 28a i 29a): 5,6-diklor-2,3-dicijanosemikinon (**DDQ**), tetraklor-1,4-benzokinon (**Cl<sub>4</sub>Q**) i tetrabrom-1,4-benzokinon (**Br<sub>4</sub>Q**); te jodidi (prikazani na slikama 28b i 29b): 4-cijano-*N*-metil-piridinijev jodid (***N*-Me-4-CNpy**), 4-dimetilamino-*N*-metilpiridinijev jodid (**4-damp**), *N*-metilpiridinijev jodid (***N*-Mepy**) i 3-klor-*N*-metilpiridinijev jodid (***N*-Me-3-Clpy**).

### 3.2. Priprava istraživanih spojeva

Soli radikala i organskih kationa priređene su modificiranjem literaturno opisanog Torrey i Hunterovog postupka,<sup>162</sup> tako da se suvišak jodida dodaje u zasićenu acetonsku otopinu kinonskog spoja. Priređena otopina se pokrije parafilmom te ostavi nekoliko sati, nakon čega se otopina dekantira, a kristali posuše na zraku. Budući da su ionski spojevi jako slabo topljivi u acetonu, soli radikal-aniona počnu kristalizirati vrlo brzo, te obično za nekoliko sati narastu kristali dovoljno veliki za difrakcijska mjerenja.

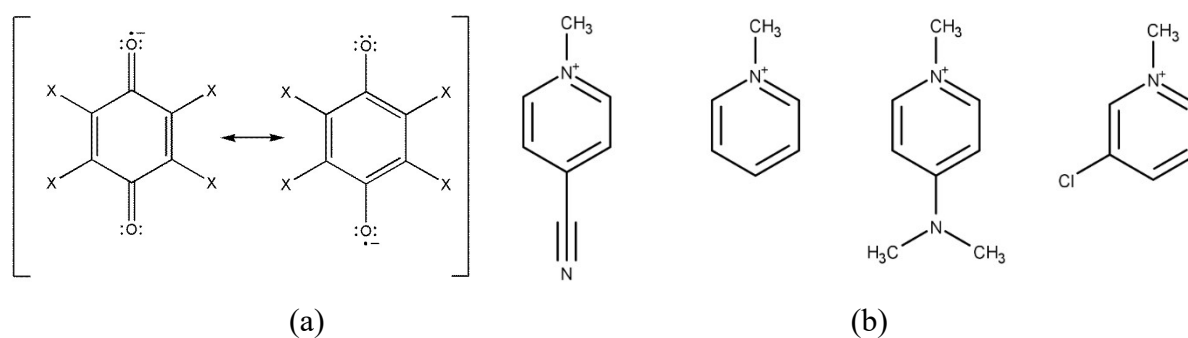

Slika 28. (a) Shematski prikaz semikinonskog radikala, X<sub>4</sub>Q, gdje je X = Cl (Cl<sub>4</sub>Q), Br (Br<sub>4</sub>Q), Cl/CN (DDQ) i (b) kationa *N*-Me-4-CNpy [*N*-Me-4-CNpy = 4-cijano-*N*-metil-piridinijev jodid], 4-damp [4-damp = 4-dimetilamino-*N*-metilpiridinijev jodid], *N*-Mepy [*N*-Mepy = *N*-metilpiridinijev jodid], *N*-Me-3-Clpy [*N*-Me-3-Clpy = 3-klor-*N*-metilpiridinijev jodid].

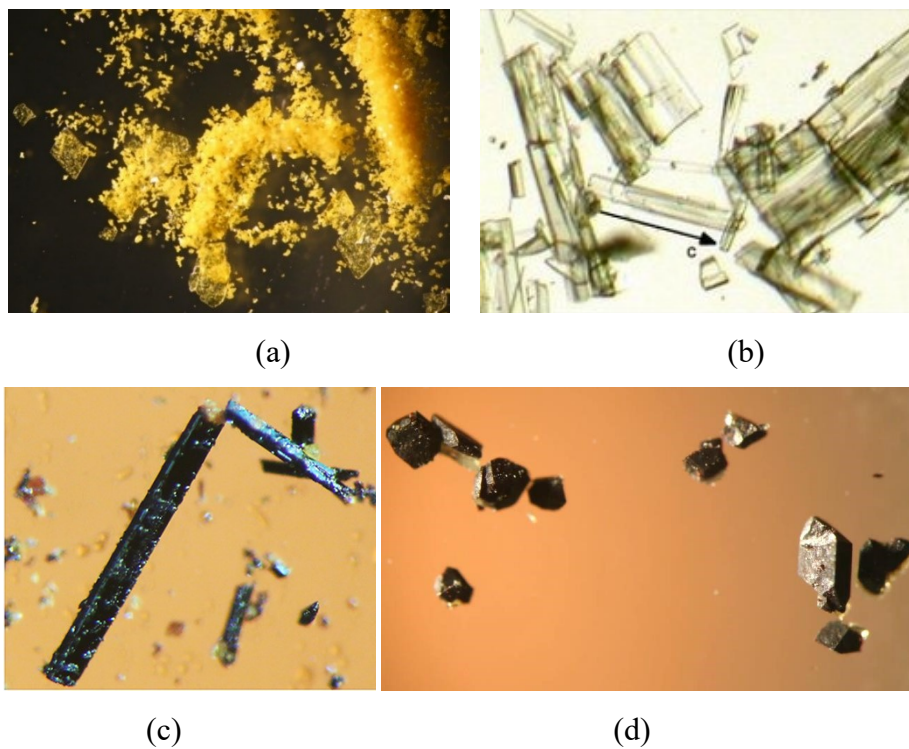

Slika 29. Prikaz fotografija početnih spojeva kinona i jodida, te sintetiziranih kristala radikala: (a) slika neutralnog kinona  $\text{Br}_4\text{Q}$ ; (b) slika jodidne soli *N*-metilpiridinijevog jodida; (c) soli *N*-metilpiridinija i tetrabromkinona; (d) kokristala tetrabromkinona i *N*-metil-3-klor-piridinijeva jodida.



*Priprava (N-Me-3-Clpy·I)<sub>2</sub>·Br<sub>4</sub>Q (4)*

*N*-metil-3-klor-piridinijev jodid, C<sub>6</sub>H<sub>7</sub>ClNI (**N-Me-3-Clpy**), pripremljen je dodavanjem acetonske otopine metil-jodida (20 mmol u 10 mL) u acetonsku otopinu 3-klor-piridina (20 mmol u 10 mL), uz miješanje. Nakon miješanja reaktanata, otopina je ostavljena da se hladi pri 0 °C nekoliko sati, nakon čega su kristali odfiltrirani i isprani hladnim acetonom.

Tetrabrom-1,4-benzokinon, **Br<sub>4</sub>Q**, otopljen je u 10 mL acetona uz miješanje. U pripravljenu otopinu dodan je suvišak **N-Me-3-Clpy**, bez miješanja, te je otopina prekrivena parafilmom. Proces kristalizacije provjeravan je laboratorijskom stereolupom Leica Wild M3C. Nakon 2-3 sata iskristalizirali su monokristali željene veličine, otopina je dekantirana, a crni igličasti kristali kokristala tetrabrom-1,4-benzokinona i *N*-metil-3-klor-piridinijeva jodida, C<sub>18</sub>H<sub>14</sub>Br<sub>4</sub>Cl<sub>2</sub>I<sub>2</sub>N<sub>2</sub>O<sub>2</sub> (spoj **4**, slika 29d), posušeni na zraku.

*Određivanje elektronske gustoće rendgenskom difrakcijom*

Za određivanje elektronske gustoće spoja **1** rendgenskom difrakcijom korišten je difraktometar Oxford Rigaku Xcalibur 3 s  $\text{MoK}_\alpha$ -cijevi ( $\lambda = 0,71073 \text{ \AA}$ ) i detektorom Sapphire2. Uređaj se nalazi na Prirodoslovno-matematičkom fakultetu u Zagrebu. Snimanje je provedeno pri 100(2) K do maksimalne rezolucije od 0,50  $\text{\AA}$ , tj. do maksimalnog kuta  $\theta$  od 45°. Za redukciju podataka i apsorpcijsku korekciju korišten je programski paket Oxford CrysAlis PRO (verzija 1.171.39.13a).<sup>163</sup>

Sferni model atoma utočnjen je koristeći SHELXL-2017;<sup>168</sup> atomske koordinate su uzete iz strukture mjerene pri sobnoj temperaturi.<sup>96</sup> Za multipolarno utočnjavanje korišten je programski paket MoPro.<sup>181</sup> Atomi klora su modelirani kao heksadekapoli, kisik, dušik i ugljik kao oktopoli i atomi vodika kao dipoli; multipoli i kapa parametri kemijski ekvivalentnih atoma su ograničeni na slične vrijednosti.

Vibracije atoma klora su utočnjene kao anharmonijske koristeći Gram–Charlierove koeficijente trećeg reda. Anizotropni parametri za vodikove atome računati su u serveru SHADE3<sup>182</sup> i fiksirani su tijekom multipolarnog utočnjavanja. Računi geometrije i elektronske gustoće izvedeni su u programu VMoPro.<sup>181</sup> Za vizualizaciju i grafički prikaz elektronske gustoće korišteni su programi MoProViewer,<sup>183</sup> ORTEP-3<sup>172</sup> i CCDC Mercury.<sup>174</sup> Kristalografski podaci i podaci utočnjavanja prikazani su u tablici D13.

Topološki redovi veze računati su koristeći formulu<sup>184</sup>

$$n_{\text{topo}} = a + b \lambda_3 + c (\lambda_1 + \lambda_2) + d \rho_{\text{cp}} \quad (7)$$

Koeficijenti  $a$ ,  $b$ ,  $c$  i  $d$  su uzeti iz literature: za veze C–C  $a = -0,522$ ,  $b = -1,695$ ,  $c = 0,000$ ,  $d = 8,473$ ;<sup>185</sup> za veze C–O  $a = -0,427$ ,  $b = -0,240$ ,  $c = 0,280$ ,  $d = 6,464$ ;<sup>186</sup> za C–N veze  $a = -0,284$ ,  $b = 0,331$ ,  $c = 0,559$ ,  $d = 6,569$ ;<sup>185</sup> za C–H veze  $a = -0,153$ ,  $b = 0,481$ ,  $c = 0,983$ ,  $d = 8,087$ .<sup>187</sup>

Za određivanje elektronske gustoće spoja **4** rendgenskom difrakcijom korišten je difraktometar Rigaku Oxford Diffraction Synergy S s mikrofokusnom  $\text{MoK}_\alpha$  ( $\lambda = 0,71073 \text{ \AA}$ ) i piksel detektorom HyPix. Instrument se nalazi na Sveučilištu u Regensburgu. Snimanje je provedeno pri 100(2) K do maksimalne rezolucije od 0,50  $\text{\AA}$ , tj. do maksimalnog kuta  $\theta$  od 45°. Za redukciju podataka i apsorpcijsku korekciju korišten je programski paket Oxford CrysAlis PRO (verzija 1.171.39.46).<sup>188</sup>

Struktura je riješena koristeći SHELXS, a sferni model atoma utočnjen je koristeći SHELXL-2017.<sup>168</sup> Za multipolarno utočnjavanje korišten je programski paket MoPro.<sup>183</sup> Halogeni atomi (Cl, Br i I) su modelirani kao heksadekapoli, O, N i C kao oktopoli i vodikovi

atomi kao dipoli; ograničenja su korištena za kape i multipole na kemijski ekvivalentnim atomima, simetrija multipola je također ograničena tako da poštuje lokalnu simetriju (molekule su približno planarne). Vodici su fiksirani na idealne položaje (constraints) i izotropno utočnjeni. Vibracije jodidnog iona i bromovih atoma su utočnjene kao anharmonične koristeći Gram–Charlierove koeficijente četvrtog reda.

Računi geometrije i elektronske gustoće izvedeni su u programu VMoPro.<sup>181</sup> Za vizualizaciju i grafički prikaz elektronske gustoće korišteni su programi MoProViewer,<sup>183</sup> ORTEP-3<sup>172</sup> i CCDC Mercury.<sup>174</sup> Kristalografski podaci i podaci utočnjavanja prikazani su u tablici D13.

Topološki redovi veze računati su koristeći formulu<sup>184</sup>

$$n_{\text{topo}} = a + b \lambda_3 + c (\lambda_1 + \lambda_2) + d \rho_{\text{cp}} \quad (8)$$

Koeficijenti  $a$ ,  $b$ ,  $c$  i  $d$  su uzeti iz literature: za veze C–C  $a = -0,522$ ,  $b = -1,695$ ,  $c = 0,000$ ,  $d = 8,473$ ;<sup>185</sup> za veze C–O  $a = -0,427$ ,  $b = -0,240$ ,  $c = 0,280$ ,  $d = 6,464$ ;<sup>186</sup> za C–N veze  $a = -0,284$ ,  $b = 0,331$ ,  $c = 0,559$ ,  $d = 6,569$ ;<sup>185</sup> za C–H veze  $a = -0,153$ ,  $b = 0,481$ ,  $c = 0,983$ ,  $d = 8,087$ .<sup>187</sup>

## Kratki kontakt $I^- \cdots \text{kinon}$

### 4.4.1. Odlike pakiranja kokristala tetrabromkinona i jodidne soli s 3-klor-*N*-metilpiridinijevim kationom s kratkim udaljenostima $I^- \cdots \text{kinon}$

U proučavanom ionskom kokristalu (**4**) tetrabromkinona i jodidne soli s 3-klor-*N*-metilpiridinijevim kationom (*N*-Me-3-Clpy·D)<sub>2</sub>·Br<sub>4</sub>Q, dva jodidna aniona čine bliske kontakte s elektronima osiromašenim kinonskim prstenom, te tvore strukturnu jedinicu  $I^- \cdots \text{kinon} \cdots I^-$  (slika 58). Kontakti uključuju udaljenosti jod–ugljik od 3,71 Å (pri 90 K), koje su kraće od sume van der Waalsovih radijusa za jod i ugljik (3,76 Å). Opisani kontakt je novi tip interakcije anion $\cdots\pi$ , između jodidnog aniona i kinoidnog prstena s udaljenostima u rasponu 3,42–3,73 Å, koja je nedavno istražena na tetrabrom- i tetraklorokinonu.<sup>89,112</sup> Navedeno istraživanje je prvi primjer nearomatskog prstena koji tvori interakcije anion $\cdots\pi$ , a također i prvi koji uključuje prijenos naboja.<sup>112</sup> Smatra se da dolazi do prijenosa naboja između jodidnog aniona i kinonskog prstena, na što ukazuje crna boja nastalog kokristala (polazni kinon je kristal žute boje, jodid kristal bijele boje). Međutim, analiza međumolekulskih interakcija te mjerenja NMR-a u krutom stanju i IR-spektroskopije pokazala su da je interakcija rezultat elektrostatskog privlačenja između elektronima bogatog jodidnog aniona i elektronima osiromašenog prstena, s malim udjelom prijenosa naboja.<sup>89,112</sup>

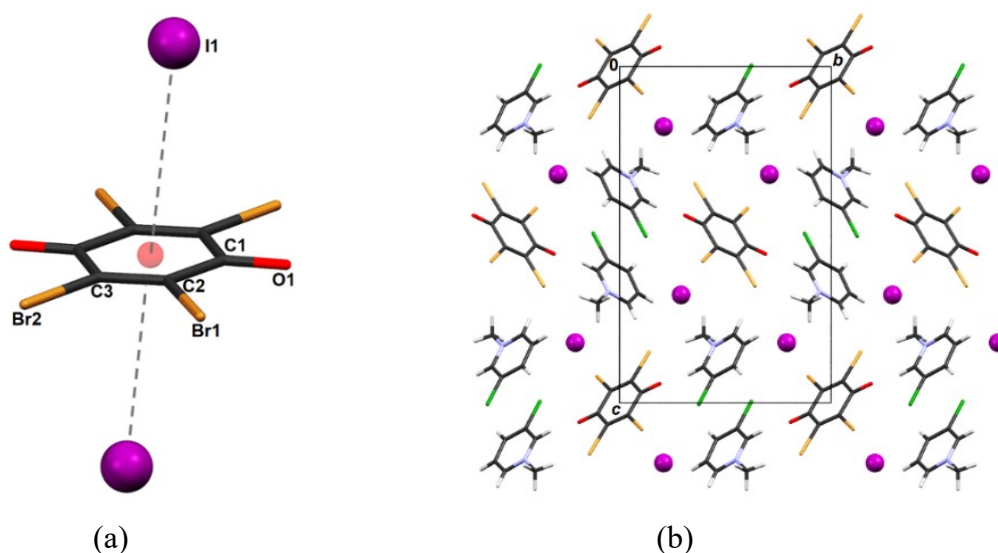

Slika 58. (a) Strukturna jedinica  $I^- \cdots \text{kinon} \cdots I^-$  u strukturi spoja **4**. Centar prstena se nalazi na kristalografskom centru inverzije i označen je crvenom bojom. (b) Prikaz kristalnog pakiranja spoja **4** u smjeru kristalografske osi *a*.

Kinon i odgovarajuća strukturna jedinica  $\text{I}^- \cdots \text{kinon} \cdots \text{I}^-$  su centrosimetrične, s jednim simetrijski neovisnim bliskim kontaktom. Za opis geometrije bliskog kontakta koriste se sljedeći geometrijski parametri: udaljenost između središta prstena i jodidnog aniona,  $d(\text{Cg})$ ; udaljenost između ravnine prstena i jodidnog aniona,  $d(\text{ravnina})$ ; kut između ravnine prstena i  $d(\text{Cg})$ ,  $\alpha$ ; i smjer pomaka u odnosu na molekulsku os  $\text{O}=\text{C} \cdots \text{C}=\text{O}$ ,  $\beta$  (slika 59). Pomak se može računati kao  $d(\text{Cg}) \cos \alpha$ .<sup>112</sup>

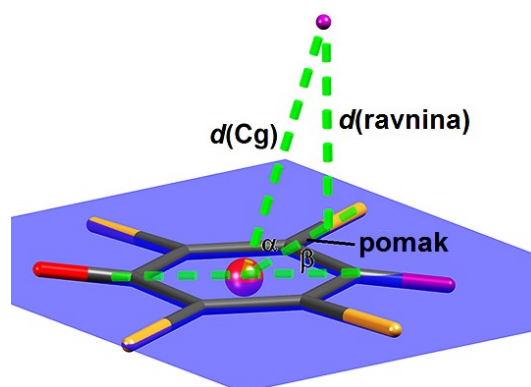

Slika 59. Prikaz geometrijskih parametara koji opisuju kontakt između kinonskog prstena i jodidnog aniona. Cg je središte prstena (crvena sfera),  $d(\text{Cg})$  je udaljenost između jodidnog aniona i centra prstena,  $d(\text{ravnina})$  je udaljenost jodidnog aniona i ravnine prstena,  $\alpha$  je kut između pravca  $\text{Cg} \cdots \text{I}^-$  i ravnine prstena, a  $\beta$  je kut koji definira smjer pomaka.<sup>112</sup>

Analize Hirshfeldovih površina<sup>i</sup> i elektrostatskog potencijala govore da kinonski prsten ima značajan pozitivan potencijal (slika 60a), što ukazuje na privlačnu intrakciju između prstena i jodidnih aniona. Središnji dio kinonskog prstena je blago udubljen, te je i veća kontaktna površina između prstena i jodidnog aniona (ukupna kontaktna površina predstavlja 7,4 %). Ovo udubljenje se jasnije vidi u prikazu s Voronoi-Dirichletovim poliedrima (VDP) (slika 60b). Udubljeni dio se sastoji od šest malih površina, a ukupna površina predstavlja 5,4 % od ukupne molekulske VDP površine. Veličina VDP površine približno je proporcionalna energiji interakcije, što govori da je interakcija  $\text{kinon} \cdots \text{I}^-$  značajna i zanimljiva za daljnja istraživanja.<sup>112</sup>

<sup>i</sup> Hirshfeldova površina predstavlja prostor koji molekula zauzima u kristalu, a omogućava mapiranje raznih svojstava plohe i okoline ( $d_e$ ,  $d_{norm}$ , zakrivljenost, srednje zakrivljenje, indeks oblika, itd.).

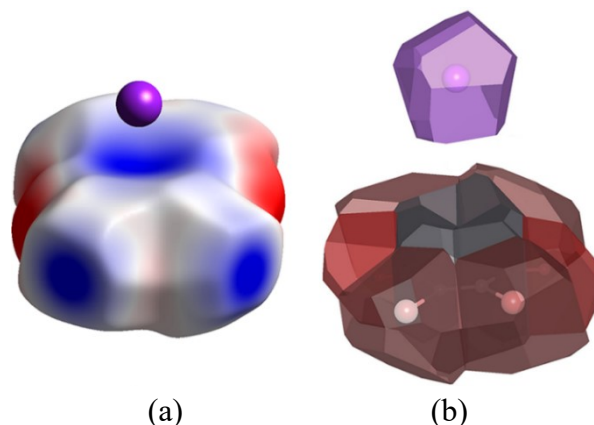

Slika 60. (a) Izračunati elektrostatski potencijal molekule tetrabromkinona mapiran na Hirshfeldovu površinu (crveno,  $-0,04$  au; plavo,  $+0,25$  au), koji prikazuje elektronima osiromašen kinonski prsten i  $\sigma$ -rupe na atomima broma; (b) VDP poliedar jodida (iznad) i  $\text{Br}_4\text{Q}$  (ispod) u kokristalu  $(N\text{-Me-3-Clpy}\cdot\text{I})_2\cdot\text{Br}_4\text{Q}$ .<sup>112</sup>

#### 4.4.2. Ponašanje kratkog kontakta $\text{I}^- \cdots \text{kinon}$ u ovisnosti o temperaturi

Temperaturna ovisnost kratkog kontakta  $\text{kinon} \cdots \text{I}^-$  u spoju **4**, proučavana je od 90 do 293 K (tablica D10). Promjene vrijednosti jedinične ćelije i volumena kao funkcije temperature za spoj **4** grafički su prikazane na slici 61. Vrijednosti parametara jedinične ćelije ( $a$ ,  $b$  i  $c$ ) i volumena  $V$  rasle su s porastom temperature, uz odstupanja vrijednosti za os  $b$ . Vrijednosti kuta  $\beta$  linearno se smanjuju s porastom temperature. Monoklinska prostorna grupa  $P2_1/c$  ne mijenja se s promjenom temperature.

Geometrijski parametri bliskog kontakta između tetrabromkinoskog prstena i jodidnog aniona su prikazani u tablici 19. Udaljenost između središta tetrabromkinoskog prstena,  $d(\text{Cg})$ , i jodidnog aniona linearno se povećavala s porastom temperature; te se od 90 K do sobne temperature povećala za  $0,10$  Å. Također, udaljenost ravnine tetrabromkinoskog prstena,  $d(\text{ravnina})$ , i jodidnog aniona linearno se povećavala s porastom temperature; te se od 90 K do sobne temperature povećala za  $0,08$  Å (slika 62). U strukturnoj jedinici  $\text{I}^- \cdots \text{kinon} \cdots \text{I}^-$  uočava se pomak aniona u smjeru  $\text{O}=\text{C} \cdots \text{C}=\text{O}$  u rasponu od  $0,62 - 0,95$  Å, rezultirajući kratkim kontaktom između jodidnih iona i C atoma.

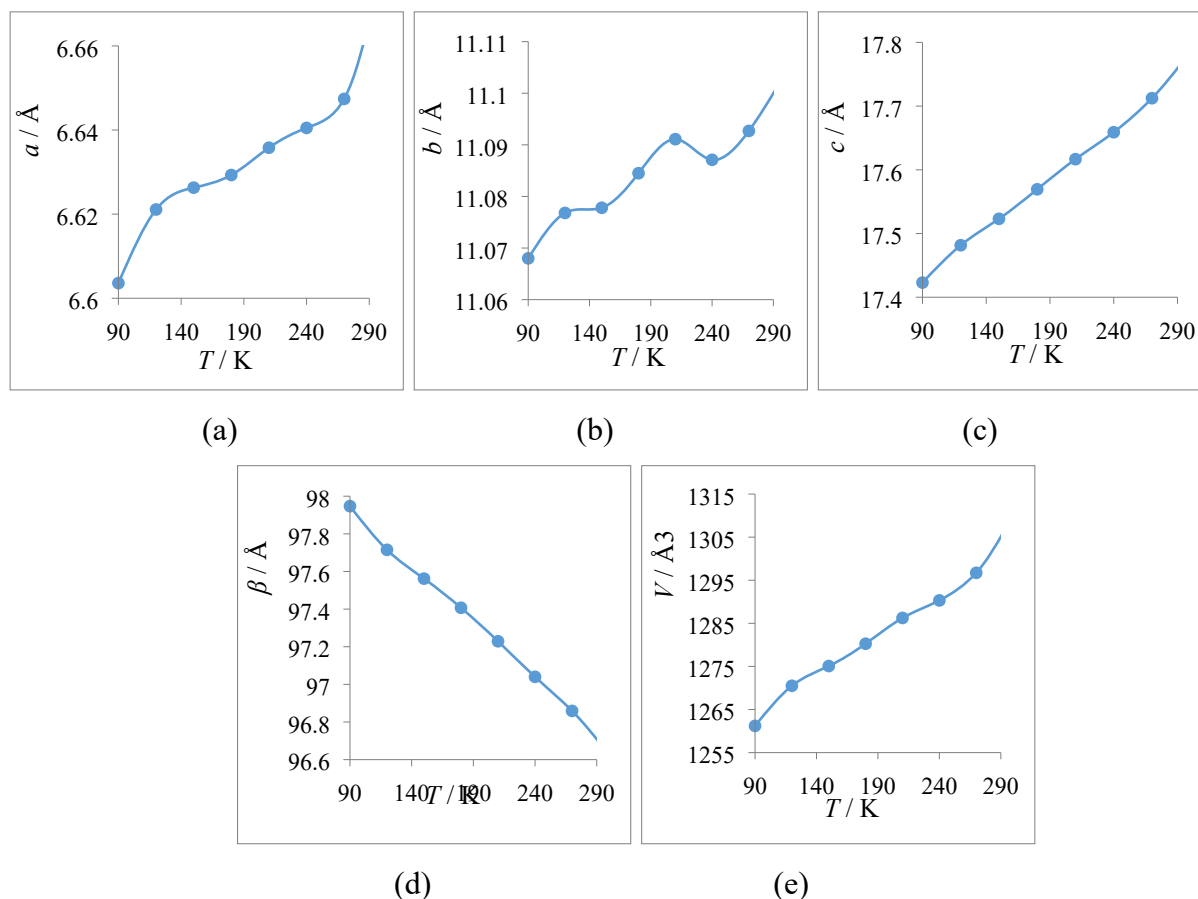

Slika 61. (a)–(d) Promjene parametara jedinične ćelije ( $a$ ,  $b$ ,  $c$  i  $\beta$ ) i (e) volumena ( $V$ ) u spoju **4** u ovisnosti o temperaturi.

Tablica 19. Geometrijski parametri bliskog kontakta  $\Gamma^- \cdots$ kinon u spoju **4** između jodidnih aniona i kinonskih prstenova u ovisnosti o temperaturi (duljine veza su izražene u Å, a kutevi u stupnjevima).

|                                | 90 K  | 120 K | 150 K | 180 K | 210 K | 240 K | 270 K | 293 K |
|--------------------------------|-------|-------|-------|-------|-------|-------|-------|-------|
| $d(\text{Cg}) / \text{Å}$      | 3,929 | 3,944 | 3,956 | 3,969 | 3,984 | 3,998 | 4,013 | 4,032 |
| $d(\text{ravnina}) / \text{Å}$ | 3,689 | 3,703 | 3,712 | 3,723 | 3,734 | 3,746 | 3,756 | 3,773 |
| $\alpha / ^\circ$              | 70,78 | 70,89 | 70,87 | 70,84 | 70,81 | 70,82 | 70,80 | 70,86 |
| $\beta / ^\circ$               | 25,00 | 25,50 | 25,90 | 26,00 | 24,00 | 25,30 | 26,10 | 24,20 |
| pomak / Å                      | 0,90  | 0,95  | 0,65  | 0,62  | 0,70  | 0,80  | 0,90  | 0,82  |

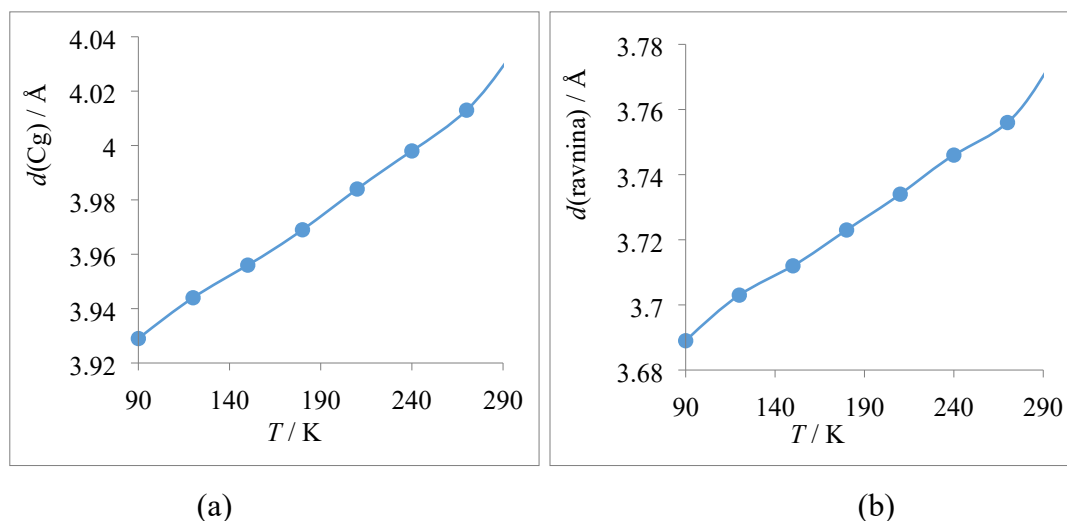

Slika 62. (a) Promjene udaljenosti između središta tetrabromkinonskih prstenova,  $d(\text{Cg})$ , i jodidnih aniona i (b) udaljenosti ravnine prstenova,  $d(\text{ravnina})$ , i jodidnih aniona spoju 4 kao funkcija temperature.

#### 4.4.3. Elektronska gustoća kratkog kontakta $\text{I}^- \cdots \text{kinon}$

Tetrabromkinon ima karakterističnu strukturu neutralnog kinona (tablica 20) s jako malom delokalizacijom: jednostruke veze C–C (C1–C2 i C1–C3') imaju red veze 0,93 i 0,98, a dvostruka veza C2–C3 ima red veze 1,94. Karbonilna C1=O1 ima red veze 1,58 s maksimumom elektronske gustoće u kritičnoj točki od 2,995 e  $\text{Å}^{-3}$ . Nedavna istraživanja elektronske gustoće tetraklorokinona<sup>104</sup> pokazala su slične vrijednosti. Red veze jednostrukih veza C–C u tetraklorokinonu je 0,94 i 1,00, dvostrukih 1,78, a karbonilnih veza C=O 1,35 (s maksimumom elektronske gustoće u kritičnoj točki od 2,862 e  $\text{Å}^{-3}$ ). Jače dvostruke veze i veća elektronska gustoća u vezi C=O kod tetrabromkinona ukazuje na slabiji induktivni efekt atoma broma u usporedbi s atomima klora, što se uočava i po slabijim jednostrukim vezama C–C. Također, istraživanja elektronske gustoće semikinona s djelomičnim prijenosom naboja<sup>85</sup> i 2,5-dihidroksikinona<sup>40,198</sup> pokazuju slične vrijednosti redova veze.



Tablica 20. Topologija elektronske gustoće **Br<sub>4</sub>Q**, dobivena iz eksperimentalne elektronske gustoće nakon multipolarnog utočnjavanja.

| Veza               | Duljina (Å) | Elektronska gustoća<br>( $e \text{ Å}^{-3}$ ) | Laplasijan<br>( $e \text{ Å}^{-5}$ ) | Eliptičnost | Red veze<br>$n_{\text{topo}}$ |
|--------------------|-------------|-----------------------------------------------|--------------------------------------|-------------|-------------------------------|
| C1–O1              | 1,2167(1)   | 2,995                                         | –31,46                               | 0,02        | 1,58                          |
| C1–C2              | 1,4884(1)   | 1,812                                         | –12,50                               | 0,11        | 0,93                          |
| C1–C3 <sup>i</sup> | 1,4880(1)   | 1,847                                         | –12,71                               | 0,08        | 0,98                          |
| C2–C3              | 1,3465(1)   | 2,363                                         | –23,62                               | 0,16        | 1,94                          |
| C2–Br1             | 1,8766(1)   | 1,104                                         | 1,08                                 | 0,02        |                               |
| C3–Br2             | 1,8751(1)   | 1,128                                         | 0,51                                 | 0,08        |                               |

Simetrijski operator: (i)  $-x, 1-y, 1-z$

Mapa elektrostatskog potencijala tetrabromkinona ima najpozitivnije vrijednosti na područjima karbonilnih atoma ugljika, tj. karbonilni atomi su osiromašeniji elektronima od drugih atoma ugljika u prstenu (slika 63d). Najnegativnija područja mape elektrostatskog potencijala su karbonilni atomi kisika s viškom negativnog naboja. Također, uočava se negativniji elektrostatski potencijal dvostrukih veza u prstenu, u odnosu na jednostruke veze gdje je potencijal pozitivniji. U mapi laplasijana tetrabromkinonskog prstena koncentracije naboja valentne ljuske ukazuju na postojanje po dva slobodna elektronska para na atomima broma (crvena područja na slici 63c), unatoč prisutnosti velikih  $\sigma$ -rupa.

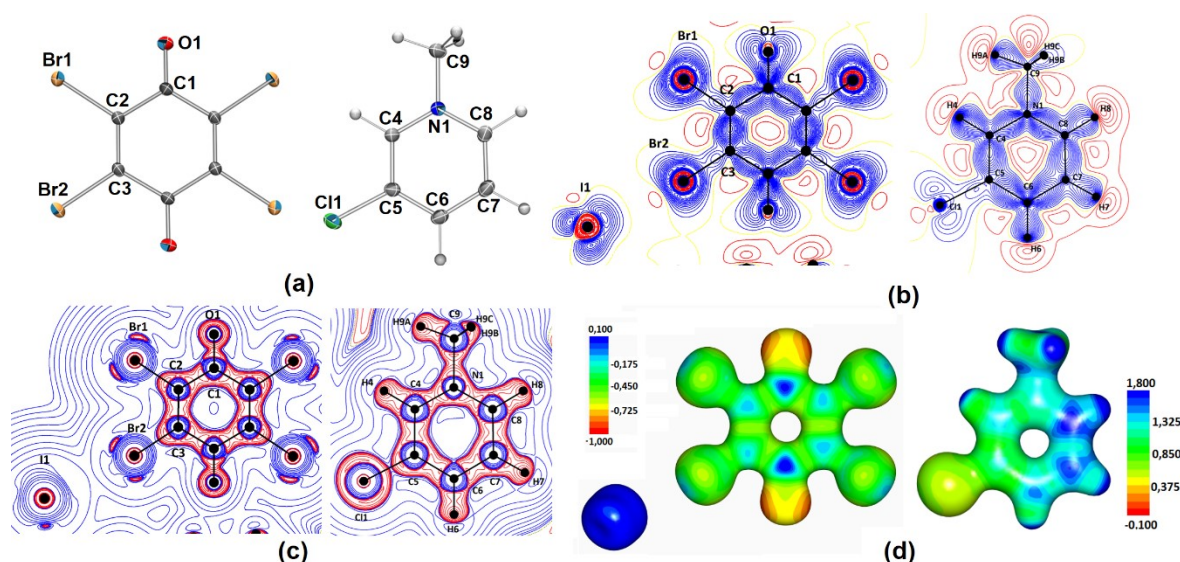

Slika 63. Molekulska struktura **Br<sub>4</sub>Q** i atoma joda (lijevo) i kationa **N-Me-3-Clpy<sup>+</sup>** (desno): (a) prikaz elipsoida pomaka (vjerojatnost nalaženja 50 %), (b) mape deformacijske gustoće (konture 0,05  $e \text{ Å}^{-3}$ ), (c) mape laplasijana (konture 2, 4,  $8 \cdot 10^n e \text{ Å}^{-5}$ ,  $n=-3 \cdots 2$ ) i (d) elektrostatski potencijal mapiran na izopovršinu elektronske gustoće 0,5  $e \text{ Å}^{-3}$ .

Elektronska gustoća u kationu *N*-Me-3-Clpy<sup>+</sup> (slika 63 i D10, tablica 21) slaže se sa sličnim ranije proučavanim kationom *N*-Mepy<sup>+</sup>.<sup>104</sup> Iz mape elektrostatskog potencijala kationa *N*-Me-3-Clpy<sup>+</sup> vidljivo je da je dio prstena negativnijeg potencijala, a razlog tome je u induktivnom efektu atoma klora (slika 63d).

Tablica 21. Topologija elektronske gustoće kationa *N*-metil-3-klor-piridinija, dobivena iz eksperimentalne elektronske gustoće nakon multipolarnog utočnjavanja.

| Veza   | Duljina (Å) | Elektronska gustoća (e Å <sup>-3</sup> ) | Laplasijan (e Å <sup>-5</sup> ) | Eliptičnost | Red veze $n_{\text{topo}}$ |
|--------|-------------|------------------------------------------|---------------------------------|-------------|----------------------------|
| C11–C5 | 1,7248(1)   | 1,343                                    | 0,01                            | 0,09        |                            |
| N1–C4  | 1,3472(1)   | 2,295                                    | –22,03                          | 0,13        | 1,33                       |
| N1–C8  | 1,3465(1)   | 2,328                                    | –24,49                          | 0,02        | 1,32                       |
| N1–C9  | 1,4753(1)   | 1,724                                    | –10,17                          | 0,05        | 1,03                       |
| C4–C5  | 1,3822(1)   | 2,167                                    | –18,96                          | 0,12        | 1,54                       |
| C5–C6  | 1,3913(1)   | 2,186                                    | –18,84                          | 0,11        | 1,53                       |
| C6–C7  | 1,3884(1)   | 2,158                                    | –18,88                          | 0,04        | 1,48                       |
| C7–C8  | 1,3837(1)   | 2,145                                    | –18,34                          | 0,12        | 1,52                       |
| C4–H4  | 1,0830(1)   | 1,927                                    | –18,86                          | 0,06        | 1,05                       |
| C6–H6  | 1,0830(1)   | 1,762                                    | –17,03                          | 0,08        | 0,96                       |
| C7–H7  | 1,0830(1)   | 1,694                                    | –13,85                          | 0,03        | 1,01                       |
| C8–H8  | 1,0830(1)   | 1,738                                    | –19,09                          | 0,06        | 0,87                       |
| C9–H9A | 1,0770(1)   | 1,737                                    | –15,51                          | 0,21        | 1,00                       |
| C9–H9B | 1,0770(1)   | 1,733                                    | –15,14                          | 0,22        | 1,01                       |
| C9–H9C | 1,0770(1)   | 1,751                                    | –15,63                          | 0,21        | 1,01                       |

Prema geometrijskim kriterijima<sup>195</sup> može se pronaći pet simetrijski-neovisnih vodikovih veza (tablica 22). Za dvije vodikove veze C–H $\cdots$ O s karbonilnim kisikom (C4–H4 $\cdots$ O1 i C9–H9A $\cdots$ O1) pronađene su i odgovarajuće kritične točke (3,–1) u elektronskoj gustoći (tablica 23), s maksimumima elektronske gustoće od 0,053 i 0,023 e Å<sup>-3</sup>.

Tablica 22. Geometrijski parametri vodikovih veza određeni prema geometrijskim kriterijima u spoju 4.

| $D-H\cdots A$       | $D-H / \text{Å}$ | $H\cdots A / \text{Å}$ | $D\cdots A / \text{Å}$ | $D-H\cdots A / ^\circ$ | Simetrijski operator na $A$ |
|---------------------|------------------|------------------------|------------------------|------------------------|-----------------------------|
| C4–H4 $\cdots$ O1   | 1,08             | 2,11                   | 3,1385(1)              | 158                    | $-x, 1-y, 1-z$              |
| C6–H6 $\cdots$ C11  | 1,08             | 2,78                   | 3,8392(1)              | 166                    | $2-x, 2-y, 1-z$             |
| C7–H7 $\cdots$ I1   | 1,08             | 3,03                   | 3,8401(1)              | 132                    | $2-x, 2-y, 1-z$             |
| C9–H9A $\cdots$ O1  | 1,08             | 2,40                   | 3,3990(1)              | 153                    | $-x, 1-y, 1-z$              |
| C9–H9C $\cdots$ Br2 | 1,08             | 2,83                   | 3,8461(1)              | 156                    | $x, 3/2-y, 1/2+z$           |

Jodidni atomi sudjeluju u halogenskim vezama sa susjednim molekulama **Br<sub>4</sub>Q**. Neutralni tetrabromkinon je dobar donor halogenske veze, što potvrđuje mapa elektrostatskog potencijala s pozitivnim područjima na atomima broma ( $\sigma$ -rupe, slika 63d i slika 65). S druge strane, svaki jodid se ponaša kao akceptor dviju halogenskih veza. Prema tome, u mapi elektronske gustoće pronađene su dvije slabe kritične točke (3,-1), koje odgovaraju halogenskim vezama C2–Br1 $\cdots$ I1 i C3–Br2 $\cdots$ I1, s maksimumima elektronske gustoće od 0,068 i 0,064 e Å<sup>-3</sup> (tablica 23, slika 64).

Između kationa **N-Me-3-Clpy<sup>+</sup>** postoje  $\pi$ -interakcije s udaljenostima između prstenova od 3,39 Å (tablica 21 i 32), kao i kod sličnih soli semikinona koji uključuju  $\pi$ -interakcije kationa.<sup>192</sup>

Tablica 23. Ukupna elektronska gustoća  $\rho_{\text{tot}}$  i laplasijan  $\nabla^2\rho$  pri kritičnim točkama u međumolekulskim kontaktima.

| A $\cdots$ B     | $d$   | $\rho_{\text{tot}} /$<br>e Å <sup>-3</sup> | Laplasijan /<br>e Å <sup>-5</sup> | $G_{\text{cp}} /$<br>e Å <sup>-3</sup> | $V_{\text{cp}} /$<br>e Å <sup>-3</sup> | $ V_{\text{cp}} /G_{\text{c}}$ | Tip<br>kritične<br>točke | Simetrijski<br>operator |
|------------------|-------|--------------------------------------------|-----------------------------------|----------------------------------------|----------------------------------------|--------------------------------|--------------------------|-------------------------|
| I1 $\cdots$ Br2  | 3,573 | 0,064                                      | 0,73                              | 0,006                                  | -0,005                                 | 0,833                          | (3,-1)                   | (i)                     |
| I1 $\cdots$ C3   | 3,737 | 0,035                                      | 0,43                              | 0,003                                  | -0,002                                 | 0,667                          | (3,-1)                   | (i)                     |
| O1 $\cdots$ H4   | 2,110 | 0,053                                      | 2,12                              |                                        |                                        |                                | (3,-1)                   | (i)                     |
| O1 $\cdots$ C11  | 3,613 | 0,028                                      | 0,34                              | 0,003                                  | -0,002                                 | 0,667                          | (3,-1)                   | (ii)                    |
| Br1 $\cdots$ C11 | 3,732 | 0,041                                      | 0,44                              | 0,004                                  | -0,003                                 | 0,750                          | (3,-1)                   | (ii)                    |
| Br1 $\cdots$ C4  | 3,654 | 0,029                                      | 0,38                              | 0,003                                  | -0,002                                 | 0,667                          | (3,-1)                   | (ii)                    |
| Br2 $\cdots$ Br2 | 3,708 | 0,047                                      | 0,57                              | 0,005                                  | -0,003                                 | 0,600                          | (3,-1)                   | (ii)                    |
| Cl1 $\cdots$ N1  | 3,571 | 0,049                                      | 0,48                              |                                        |                                        |                                | (3,-1)                   | (ii)                    |
| I1 $\cdots$ Br1  | 3,492 | 0,068                                      | 0,73                              | 0,006                                  | -0,005                                 | 0,833                          | (3,-1)                   | (iii)                   |
| I1 $\cdots$ N1   | 3,697 | 0,034                                      | 0,44                              | 0,003                                  | -0,002                                 | 0,667                          | (3,-1)                   | (iv)                    |
| I1 $\cdots$ C8   | 3,618 | 0,048                                      | 0,50                              | 0,004                                  | -0,003                                 | 0,750                          | (3,-1)                   | (v)                     |
| Cl1 $\cdots$ C4  | 3,434 | 0,049                                      | 0,48                              | 0,004                                  | -0,003                                 | 0,750                          | (3,-1)                   | (v)                     |
| I1 $\cdots$ C2   | 3,844 | 0,035                                      | 0,43                              |                                        |                                        |                                | (3,-1)                   | (vi)                    |
| I1 $\cdots$ C7   | 4,128 | 0,032                                      | 0,54                              |                                        |                                        |                                | (3,-1)                   | (vii)                   |
| Br1 $\cdots$ C5  | 3,713 | 0,027                                      | 0,42                              |                                        |                                        |                                | (3,+1)                   | (ii)                    |
| C1 $\cdots$ C11  | 3,793 | 0,026                                      | 0,32                              |                                        |                                        |                                | (3,+1)                   | (ii)                    |
| Br2 $\cdots$ C1  | 4,846 | 0,006                                      | 0,08                              |                                        |                                        |                                | (3,+3)                   | (ii)                    |

Simetrijski operator na B: (i)  $-x, -y+1, -z+1$ ; (ii)  $-x+1, -y+1, -z+1$ ; (iii)  $-x+1, y+1/2, -z+1/2$ ; (iv)  $x, -y+3/2, z-1/2$ ; (v)  $-x+1, -y+2, -z+1$ ; (vi)  $x+1, y, z$ ; (vii)  $-x+2, -y+2, -z+1$

Tablica 24. Geometrijski parametri  $\pi$ -interakcija između kationa *N*-metil-3-klor-piridinija.

| $\pi\cdots\pi$                                   | Udaljenost središta<br>prstenova / Å | Udaljenost<br>ravnina prstenova<br>/ Å | Posmak<br>/ Å | Simetrijski<br>operator |
|--------------------------------------------------|--------------------------------------|----------------------------------------|---------------|-------------------------|
| N1 $\rightarrow$ C8 $\cdots$ N1 $\rightarrow$ C8 | 4,9410(1)                            | 3,3861                                 | 3,598         | 1-x, 2-y, 1-z           |

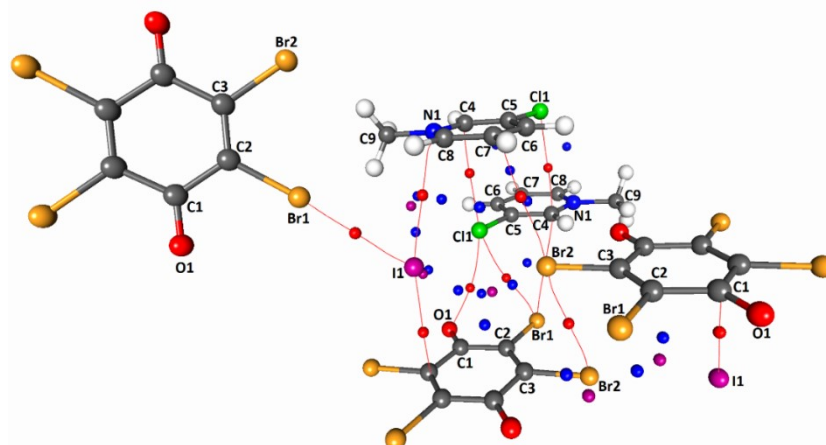

Slika 64. Kritične točke u spoju **4**. Putevi veze su prikazani kao crvene linije, kritične točke veze (3,-1) su prikazane kao crvene sfere, kritične točke prstena (3,+1) kao plave, a kritične točke kaveza (3,+3) (lokalni minimum elektronske gustoće) kao ljubičaste.

Raspodjela elektrostatskog potencijala pokazuje kinonski prsten koji je osiromašen elektronima i  $\sigma$ -rupe na atomima broma. Kinonski prsten ima značajan pozitivan elektrostatski potencijal, što ukazuje na privlačnu interakciju između tetrabromkinonskog prstena i jodidnih aniona (slika 65). Analizom topologije elektronske gustoće pronađena je samo jedna slabija kritična točka (3,-1) za interakciju jodid $\cdots$ kinon (I1 $\cdots$ C3), slika 64. Maksimum elektronske gustoće od 0,035 e  $\text{\AA}^{-3}$  (tablica 24) govori da je kovalentna komponenta interakcije zanemariva, te se kontakt jodid $\cdots$ kinon može objasniti kao elektrostatska interakcija.

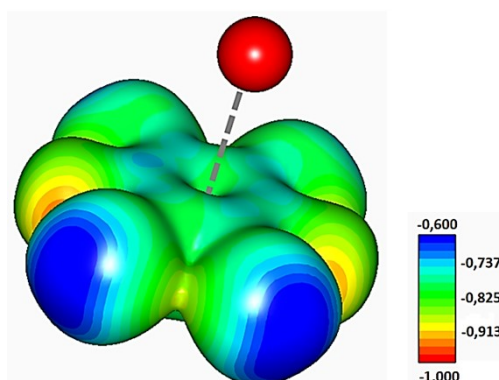

Slika 65. Shematski prikaz kontakta jodid $\cdots$ kinon, gdje je jodid označen crvenom bojom, a tetrabromkinonski prsten prikazan mapom elektrostatskog potencijala mapiranog na izopovršinu elektronske gustoće 0,05 e  $\text{\AA}^{-3}$ .

#### 4.5. Usporedba elektronske gustoće u nearomatskim prstenovima

Eksperimentalna istraživanja elektronske gustoće omogućavaju određivanje vrijednosti elektronske gustoće u kritičnim točkama veze, iz kojih se može odrediti red veze (tj. stupanj elektronske delokalizacije). Prema tome, topološki redovi veze određeni su za sva četiri (semi)kinonska prstena (spojevi 1–4) i uspoređeni s vrijednostima za neutralni kinon, Cl<sub>4</sub>Q (jako mala delokalizacija) i potpuno delokalizirani tetraklorhidrokinon, H<sub>2</sub>Cl<sub>4</sub>Q (tablica 25). Dobivene vrijednosti potvrđuju da su  $\pi$ -elektroni u semikinonskim prstenovima (spojevi 1–3) djelomično delokalizirani, te je delokalizacija veća u odnosu na neutralni kinon, ali ipak puno manja u odnosu na potpunu delokalizaciju kod hidrokinona. Tetrabromkinon u spoju 4 ima karakterističnu strukturu neutralnog kinona (tablica 25) s jako malom delokalizacijom.

Ovim radom smo potvrdili i objasnili tri moguća, i do sada poznata, tipa interakcije planarnih radikala. Prva vrsta uključuje jaku *palačinka-vezu*, koja je uglavnom kovalentna i sa značajnim doprinosom elektrostatske komponente, a prisutna je unutar dimera radikala (spoj 1). Druga vrsta bi bila slabija *palačinka-veza* s jakim elektrostatskim doprinosom i malim udjelom kovalentne komponente, a utvrđena je u ekvidistantnim radikalima (spoj 3). Treća vrsta uključuje *palačinka-veze* djelomično nabijenih radikala u trimeru (spoj 2). Između dimera radikala, odnosno trimera radikala prisutna je disperzijska interakcija. Prva vrsta je najzanimljivija s gledišta teorije kemijske veze, budući da predstavlja granicu između međumolekulskih i intramolekulskih interakcija (slične jakim vodikovim vezama). S druge strane, druga vrsta je najzanimljivija u svrhu primjene, budući da spojevi s takvom interakcijom pokazuju električna i magnetska svojstva.

Uspoređujući s rezultatima iz literature,<sup>4,89,104,189,199</sup> potvrdili smo prisutnost *palačinka-veze* u sve tri vrste planarnih radikala, stupci dimera radikala, stupci trimera radikala i stupci ekvidistantnih radikala. Kriteriji za identificiranje *palačinka-veza* između semikinonskih radikala su: (i) elektronska gustoća u kritičnim točkama (3,-1) veća od 0,05 e Å<sup>-3</sup>, (ii) prisutnost brojnih kritičnih točaka (3,-1), i (iii) prisutnost lokalnog minimuma elektronske gustoće [kritična točka (3,+3)]. U sva tri spoja prisutan je lokalni minimum elektronske gustoće između semikinonskih radikala, te je elektronska gustoća veća od 0,05 e Å<sup>-3</sup> (tablica 26).

Tablica 25. Redovi veze za spojeve 1–4 dobiveni iz elektronske gustoće. Usporedbe radi navedeni su redovi veze za neutralni kinon Cl<sub>4</sub>Q i tetraklorhidrokinon H<sub>2</sub>Cl<sub>4</sub>Q iz literature.<sup>104</sup>

|                                                     | Neutralni<br>Cl <sub>4</sub> Q kinon <sup>104</sup> | Neutralni<br>kinon<br>(spoj 4) | Ekvidistantni<br>(spoj 3) | Kinon 1<br>trimer<br>(spoj 2) | Kinon 2<br>trimer<br>(spoj 2) | Dimer<br>(spoj 1) | H <sub>2</sub> Cl <sub>4</sub> Q <sup>104</sup> |
|-----------------------------------------------------|-----------------------------------------------------|--------------------------------|---------------------------|-------------------------------|-------------------------------|-------------------|-------------------------------------------------|
| C1–O1                                               | 1,35                                                | 1,58                           | 1,23                      | 1,47                          | 1,50                          | 1,47              | 1,06                                            |
| C4–O2                                               | 1,35                                                | 1,58                           | 1,23                      | 1,47                          | 1,50                          | 1,47              | 1,06                                            |
| C1–C2                                               | 1,00                                                | 0,93                           | 1,21                      | 0,96                          | 1,03                          | 1,16              | 1,43                                            |
| C1–C6 / C7–C9 <sup>i</sup> /<br>C1–C3 <sup>ii</sup> | 0,94                                                | 0,98                           | 1,34                      | 0,95                          | 1,04                          | 1,06              | 1,31                                            |
| C2–C3                                               | 1,78                                                | 1,94                           | 1,71                      | 1,48                          | 1,37                          | 1,48              | 1,31                                            |
| C3–C4 / C9–C7 <sup>i</sup> /<br>C3–C1 <sup>ii</sup> | 1,08                                                | 0,98                           | 1,34                      | 0,97                          | 1,04                          | 1,12              | 1,34                                            |
| C4–C5                                               | 1,00                                                | 0,93                           | 1,21                      | 0,96                          | 1,03                          | 1,08              | 1,43                                            |
| C5–C6                                               | 1,78                                                | 1,94                           | 1,71                      | 1,45                          | 1,37                          | 1,66              | 1,42                                            |

Simetrijski operatori: (i)  $-x+1, -y+1, -z+1$ ; (ii)  $x, -y+3/2, z$

Tablica 26. Usporedni prikaz maksimuma elektronske gustoće u kritičnim točkama (3,-1) i laplasijana između semikinonskih radikala u spojevima 1, 2 i 3.

|                         | Udaljenost ravnina<br>prstenova (Å) | $\rho_{max} / e \text{ \AA}^{-3}$ | Laplasijan / $e \text{ \AA}^{-5}$ |
|-------------------------|-------------------------------------|-----------------------------------|-----------------------------------|
| unutar dimera (spoj 1)  | 2,98                                | 0,085                             | 0,91                              |
| između dimera (spoj 1)  | 3,41                                | 0,039                             | 0,52                              |
| unutar trimera (spoj 2) | 2,73                                | 0,093                             | 1,29                              |
| između trimera (spoj 2) | 3,62                                | 0,057                             | 0,40                              |
| ekvidistantni (spoj 3)  | 3,69                                | 0,058                             | 0,57                              |

Tablica D4. Kristalografski podaci za spoj 4 pri temperaturi od 90 K do 293 K.

| 4                                                                          | 90 K                                             | 120 K                                              | 150 K                                             |
|----------------------------------------------------------------------------|--------------------------------------------------|----------------------------------------------------|---------------------------------------------------|
| Formula                                                                    | $C_{18}H_{14}Br_4Cl_2I_2N_2O_2$                  | $C_{18}H_{14}Br_4Cl_2I_2N_2O_2$                    | $C_{18}H_{14}Br_4Cl_2I_2N_2O_2$                   |
| $M_r / g mol^{-1}$                                                         | 934,61                                           | 934,61                                             | 934,61                                            |
| Boja kristala                                                              | crna                                             | crna                                               | crna                                              |
| Dimenzija kristala / mm                                                    | 0,60 x 0,26 x 0,21                               | 0,10 x 0,05 x 0,04                                 | 0,10 x 0,05 x 0,04                                |
| Prostorna grupa                                                            | $P2_1/c$                                         | $P2_1/c$                                           | $P2_1/c$                                          |
| $a / \text{Å}$                                                             | 6,6036(13)                                       | 6,62110(10)                                        | 6,62630(10)                                       |
| $b / \text{Å}$                                                             | 11,068(2)                                        | 11,0768(2)                                         | 11,07780(10)                                      |
| $c / \text{Å}$                                                             | 17,423(2)                                        | 17,4816(2)                                         | 17,5231(2)                                        |
| $\alpha / ^\circ$                                                          | 90                                               | 90                                                 | 90                                                |
| $\beta / ^\circ$                                                           | 97,947(13)                                       | 97,715(10)                                         | 97,562(10)                                        |
| $\gamma / ^\circ$                                                          | 90                                               | 90                                                 | 90                                                |
| $Z$                                                                        | 2                                                | 2                                                  | 2                                                 |
| $V / \text{Å}^3$                                                           | 1261,2(4)                                        | 1270,51(3)                                         | 1275,09(3)                                        |
| $D_{\text{calc}} / g cm^{-3}$                                              | 2,461                                            | 2,443                                              | 2,434                                             |
| $\lambda / \text{Å}$                                                       | 0,71073 (MoK $\alpha$ )                          | 1,54184 (CuK $\alpha$ )                            | 1,54184 (CuK $\alpha$ )                           |
| $\mu / mm^{-1}$                                                            | 9,061                                            | 28,911                                             | 28,808                                            |
| Raspon kuteva $\theta / ^\circ$                                            | 2,19 – 26,97                                     | 4,74 – 76,40                                       | 4,73 – 76,42                                      |
| $T / K$                                                                    | 90(2)                                            | 120(2)                                             | 150(2)                                            |
| Difraktometar                                                              | Enraf Nonius CAD4                                | Xcalibur Nova                                      | Xcalibur Nova                                     |
| Raspon $h, k, l$                                                           | $0 < h < 8;$<br>$-14 < k < 0;$<br>$-22 < l < 22$ | $-7 < h < 8;$<br>$-13 < k < 13;$<br>$-21 < l < 19$ | $-8 < h < 8;$<br>$-13 < k < 9;$<br>$-21 < l < 18$ |
| Broj izmjerenih refleksa                                                   | 3265                                             | 6220                                               | 6025                                              |
| Broj neovisnih refleksa                                                    | 2746                                             | 2629                                               | 2641                                              |
| Broj opaženih refleksa,<br>$I \geq 2\sigma$                                | 2493                                             | 2498                                               | 2521                                              |
| Apsorpcijska korekcija                                                     | Analitička                                       | Multi-scan                                         | Multi-scan                                        |
| $T_{\text{min}}, T_{\text{max}}$                                           | 0,8140;<br>0,8590                                | 0,3213;<br>1,0000                                  | 0,3727;<br>1,0000                                 |
| $R_{\text{int}}$                                                           | 0,2351                                           | 0,0399                                             | 0,0361                                            |
| $R (F)$                                                                    | 0,0514                                           | 0,0348                                             | 0,0323                                            |
| $R_w (F^2)$                                                                | 0,1418                                           | 0,0938                                             | 0,0839                                            |
| Goodness of fit, $S$                                                       | 1,084                                            | 0,999                                              | 0,994                                             |
| Tretiranje atoma H                                                         | fiksirani                                        | fiksirani                                          | fiksirani                                         |
| Broj parametara                                                            | 137                                              | 136                                                | 136                                               |
| $\Delta\rho_{\text{max}}, \Delta\rho_{\text{min}}$<br>( $e\text{Å}^{-3}$ ) | 2,716; -3,21                                     | 0,935; -1,540                                      | 0,843; -1,468                                     |

Tablica D4. Nastavak

| 4                                                                          | 180 K                                              | 210 K                                              | 240 K                                              |
|----------------------------------------------------------------------------|----------------------------------------------------|----------------------------------------------------|----------------------------------------------------|
| Formula                                                                    | $C_{18}H_{14}Br_4Cl_2I_2N_2O_2$                    | $C_{18}H_{14}Br_4Cl_2I_2N_2O_2$                    | $C_{18}H_{14}Br_4Cl_2I_2N_2O_2$                    |
| $Mr / g mol^{-1}$                                                          | 934,61                                             | 934,61                                             | 934,61                                             |
| Boja kristala                                                              | crna                                               | crna                                               | crna                                               |
| Dimenzija kristala / mm                                                    | 0,10 x 0,05 x 0,04                                 | 0,10 x 0,05 x 0,04                                 | 0,10 x 0,05 x 0,04                                 |
| Prostorna grupa                                                            | $P2_1/c$                                           | $P2_1/c$                                           | $P2_1/c$                                           |
| $a / \text{Å}$                                                             | 6,62930(10)                                        | 6,63580(10)                                        | 6,64050(10)                                        |
| $b / \text{Å}$                                                             | 11,08450(10)                                       | 11,0911(2)                                         | 11,08710(10)                                       |
| $c / \text{Å}$                                                             | 17,5694(2)                                         | 17,6167(3)                                         | 17,6590(2)                                         |
| $\alpha / ^\circ$                                                          | 90                                                 | 90                                                 | 90                                                 |
| $\beta / ^\circ$                                                           | 97,407(10)                                         | 97,2290(10)                                        | 97,0400(10)                                        |
| $\gamma / ^\circ$                                                          | 90                                                 | 90                                                 | 90                                                 |
| $Z$                                                                        | 2                                                  | 2                                                  | 2                                                  |
| $V / \text{Å}^3$                                                           | 1280,27(3)                                         | 1286,25(4)                                         | 1290,32(3)                                         |
| $D_{\text{calc}} / g cm^{-3}$                                              | 2,424                                              | 2,413                                              | 2,406                                              |
| $\lambda / \text{Å}$                                                       | 1,54184 (CuK $\alpha$ )                            | 1,54184 (CuK $\alpha$ )                            | 1,54184 (CuK $\alpha$ )                            |
| $\mu / mm^{-1}$                                                            | 28,691                                             | 28,558                                             | 28,468                                             |
| Raspon kuteva $\Theta / ^\circ$                                            | 4,73 – 76,40                                       | 4,72 – 76,29                                       | 4,72 – 76,21                                       |
| $T / K$                                                                    | 180(2)                                             | 210(2)                                             | 240(2)                                             |
| Difraktometar                                                              | Xcalibur Nova                                      | Xcalibur Nova                                      | Xcalibur Nova                                      |
| Raspon $h, k, l$                                                           | $-8 < h < 8;$<br>$-13 < k < 12;$<br>$-21 < l < 16$ | $-8 < h < 7;$<br>$-13 < k < 13;$<br>$-22 < l < 19$ | $-7 < h < 8;$<br>$-13 < k < 11;$<br>$-19 < l < 22$ |
| Broj izmjerenih refleksa                                                   | 6131                                               | 6316                                               | 6285                                               |
| Broj neovisnih refleksa                                                    | 2646                                               | 2658                                               | 2680                                               |
| Broj opaženih refleksa,<br>$I \geq 2\sigma$                                | 2474                                               | 2537                                               | 2517                                               |
| Apsorpcijska korekcija                                                     | Multi-scan                                         | Multi-scan                                         | Multi-scan                                         |
| $T_{\text{min}}, T_{\text{max}}$                                           | 0,4769;<br>1,0000                                  | 0,3754; 1,0000                                     | 0,3750; 1,0000                                     |
| $R_{\text{int}}$                                                           | 0,0438                                             | 0,0366                                             | 0,0372                                             |
| $R (F)$                                                                    | 0,0441                                             | 0,0356                                             | 0,0352                                             |
| $R_w (F^2)$                                                                | 0,1095                                             | 0,0956                                             | 0,0953                                             |
| Goodness of fit, $S$                                                       | 1,053                                              | 1,009                                              | 1,032                                              |
| Tretiranje atoma H                                                         | fiksirani                                          | fiksirani                                          | fiksirani                                          |
| Broj parametara                                                            | 136                                                | 136                                                | 136                                                |
| $\Delta\rho_{\text{max}}, \Delta\rho_{\text{min}}$<br>( $e\text{Å}^{-3}$ ) | 1,573; -2,996                                      | 0,798; -1,444                                      | 0,776; -1,192                                      |

Tablica D4. Nastavak



| 4                                                                          | 270 K                                              | 293 K                                            |
|----------------------------------------------------------------------------|----------------------------------------------------|--------------------------------------------------|
| Formula                                                                    | $C_{18}H_{14}Br_4Cl_2I_2N_2O_2$                    | $C_{18}H_{14}Br_4Cl_2I_2N_2O_2$                  |
| $M_r / \text{g mol}^{-1}$                                                  | 934,61                                             | 934,61                                           |
| Boja kristala                                                              | crna                                               | crna                                             |
| Dimenzija kristala / mm                                                    | 0,10 x 0,05 x 0,04                                 | 0,60 x 0,26 x 0,21                               |
| Prostorna grupa                                                            | $P2_1/c$                                           | $P2_1/c$                                         |
| $a / \text{Å}$                                                             | 6,64740(10)                                        | 6,6698(7)                                        |
| $b / \text{Å}$                                                             | 11,09270(10)                                       | 11,1012(11)                                      |
| $c / \text{Å}$                                                             | 17,71240(10)                                       | 17,767(2)                                        |
| $\alpha / ^\circ$                                                          | 90                                                 | 90                                               |
| $\beta / ^\circ$                                                           | 96,8590(10)                                        | 96,684(9)                                        |
| $\gamma / ^\circ$                                                          | 90                                                 | 90                                               |
| $Z$                                                                        | 2                                                  | 2                                                |
| $V / \text{Å}^3$                                                           | 1296,72(2)                                         | 1306,6(2)                                        |
| $D_{\text{calc}} / \text{g cm}^{-3}$                                       | 2,394                                              | 2,376                                            |
| $\lambda / \text{Å}$                                                       | 1,54184 (CuK $\alpha$ )                            | 0,71073 (MoK $\alpha$ )                          |
| $\mu / \text{mm}^{-1}$                                                     | 28,327                                             | 8,746                                            |
| Raspon kuteva $\Theta / ^\circ$                                            | 4,71 – 76,11                                       | 2,17 – 26,96                                     |
| $T / \text{K}$                                                             | 270(2)                                             | 293(2)                                           |
| Difraktometar                                                              | Xcalibur Nova                                      | Enraf Nonius CAD4                                |
| Raspon $h, k, l$                                                           | $-8 < h < 8;$<br>$-13 < k < 12;$<br>$-21 < l < 16$ | $-8 < h < 0;$<br>$0 < k < 14;$<br>$-22 < l < 22$ |
| Broj izmjerenih refleksa                                                   | 6382                                               | 3090                                             |
| Broj neovisnih refleksa                                                    | 2689                                               | 2844                                             |
| Broj opaženih refleksa,<br>$I \geq 2\sigma$                                | 2541                                               | 2312                                             |
| Apsorpcijska korekcija                                                     | Multi-scan                                         | Analitička                                       |
| $T_{\text{min}}, T_{\text{max}}$                                           | 0,3534; 1,0000                                     | 0,8322; 0,8868                                   |
| $R_{\text{int}}$                                                           | 0,0309                                             | 0,0397                                           |
| $R (F)$                                                                    | 0,0373                                             | 0,0489                                           |
| $R_w (F^2)$                                                                | 0,0956                                             | 0,1312                                           |
| Goodness of fit, $S$                                                       | 1,012                                              | 1,075                                            |
| Tretiranje atoma H                                                         | fiksirani                                          | fiksirani                                        |
| Broj parametara                                                            | 136                                                | 137                                              |
| $\Delta\rho_{\text{max}}, \Delta\rho_{\text{min}}$<br>( $e\text{Å}^{-3}$ ) | 1,333; -1,444                                      | 2,132; -1,750                                    |

Tablica D10. Geometrijski parametri  $\pi$ -interakcija između kationa *N*-metil-3-klor-piridinija pri različitim temperaturama od 90–293 K u spoju **4**.

| $\pi \cdots \pi$ | Udaljenost<br>središta<br>prstenova / Å | $\alpha$   | $\beta$  | Udaljenost<br>ravnina<br>prstenova / Å | Posmak<br>/ Å | Simetrijski<br>operator                 |
|------------------|-----------------------------------------|------------|----------|----------------------------------------|---------------|-----------------------------------------|
| <b>90 K</b>      |                                         |            |          |                                        |               |                                         |
| N1→C8⋯N1→<br>C8  | 4,929(4)                                | 0,0(3<br>) | 46,<br>6 | 3,386(3)                               | 3,582         | 2− <i>x</i> , 2− <i>y</i> , 1− <i>z</i> |
| <b>120 K</b>     |                                         |            |          |                                        |               |                                         |
| N1→C8⋯N1→<br>C8  | 4,950(3)                                | 0,0(2<br>) | 46,<br>7 | 3,3915(19)                             | 3,605         | 2− <i>x</i> , 2− <i>y</i> , 1− <i>z</i> |
| <b>150 K</b>     |                                         |            |          |                                        |               |                                         |
| N1→C8⋯N1→<br>C8  | 4,961(2)                                | 0,0(2<br>) | 46,<br>8 | 3,3951(17)                             | 3,617         | 2− <i>x</i> , 2− <i>y</i> , 1− <i>z</i> |
| <b>180 K</b>     |                                         |            |          |                                        |               |                                         |
| N1→C8⋯N1→<br>C8  | 4,972(3)                                | 0,0(2<br>) | 46,<br>7 | 3,407(2)                               | 3,621         | 2− <i>x</i> , 2− <i>y</i> , 1− <i>z</i> |
| <b>210 K</b>     |                                         |            |          |                                        |               |                                         |
| N1→C8⋯N1→<br>C8  | 4,998(3)                                | 0,0(2<br>) | 46,<br>8 | 3,4214(18)                             | 3,643         | 2− <i>x</i> , 2− <i>y</i> , 1− <i>z</i> |
| <b>240 K</b>     |                                         |            |          |                                        |               |                                         |
| N1→C8⋯N1→<br>C8  | 5,012(3)                                | 0,0(2<br>) | 46,<br>9 | 3,4225(19)                             | 3,661         | 2− <i>x</i> , 2− <i>y</i> , 1− <i>z</i> |
| <b>270 K</b>     |                                         |            |          |                                        |               |                                         |
| N1→C8⋯N1→<br>C8  | 5,031(3)                                | 0,0(2<br>) | 46,<br>8 | 3,4439(19)                             | 3,667         | 2− <i>x</i> , 2− <i>y</i> , 1− <i>z</i> |
| <b>293 K</b>     |                                         |            |          |                                        |               |                                         |
| N1→C8⋯N1→<br>C8  | 5,048(4)                                | 0,0(3<br>) | 46,<br>7 | 3,463(3)                               | 3,673         | 2− <i>x</i> , 2− <i>y</i> , 1− <i>z</i> |

Tablica D13. Kristalografski podaci i podaci utočnjavanja elektronske gustoće za spojeve 1 i 4.

| Spoj                                                                                         | 1                                                                                          | 4                                                                                                            |
|----------------------------------------------------------------------------------------------|--------------------------------------------------------------------------------------------|--------------------------------------------------------------------------------------------------------------|
| Formula                                                                                      | C <sub>15</sub> H <sub>7</sub> Cl <sub>2</sub> N <sub>4</sub> O <sub>2</sub>               | C <sub>18</sub> H <sub>14</sub> Br <sub>4</sub> Cl <sub>2</sub> I <sub>2</sub> N <sub>2</sub> O <sub>2</sub> |
| <i>Mr</i> / g mol <sup>-1</sup>                                                              | 346,13                                                                                     | 934,61                                                                                                       |
| Dimenzije kristala / mm                                                                      | 0,558 x 0,183 x 0,115                                                                      | 0,24 x 0,08 x 0,05                                                                                           |
| Prostorna grupa                                                                              | <i>P</i> 2 <sub>1</sub> / <i>n</i>                                                         | <i>P</i> 2 <sub>1</sub> / <i>c</i>                                                                           |
| <i>a</i> / Å                                                                                 | 6,75290(8)                                                                                 | 6,6217                                                                                                       |
| <i>b</i> / Å                                                                                 | 10,06907(9)                                                                                | 11,07500(10)                                                                                                 |
| <i>c</i> / Å                                                                                 | 20,45854(19)                                                                               | 17,46680(10)                                                                                                 |
| <i>α</i> / °                                                                                 | 90                                                                                         | 90                                                                                                           |
| <i>β</i> / °                                                                                 | 94,7610(9)                                                                                 | 97,7670(10)                                                                                                  |
| <i>γ</i> / °                                                                                 | 90                                                                                         | 90                                                                                                           |
| <i>Z</i>                                                                                     | 4                                                                                          | 2                                                                                                            |
| <i>V</i> / Å <sup>3</sup>                                                                    | 1386,29(2)                                                                                 | 1269,24(14)                                                                                                  |
| <i>D</i> <sub>calc</sub> / g cm <sup>-3</sup>                                                | 1,659                                                                                      | 2,445                                                                                                        |
| <i>μ</i> / mm <sup>-1</sup>                                                                  | 0,054                                                                                      | 9,003                                                                                                        |
| Raspon kuteva <i>θ</i> / °                                                                   | 4,27 – 45,02                                                                               | 1,00 – 45,29                                                                                                 |
| <i>T</i> / K                                                                                 | 100(5)                                                                                     | 100(2)                                                                                                       |
| Zračenje                                                                                     | 0,71073 (MoK $\alpha$ )                                                                    | 0,71073 (MoK $\alpha$ )                                                                                      |
| Difraktometar                                                                                | Xcalibur 3                                                                                 | Rigaku Oxford<br>Diffraction Synergy S                                                                       |
| Raspon <i>h</i> , <i>k</i> , <i>l</i>                                                        | -13 < <i>h</i> < 13;<br>-19 < <i>k</i> < 19;<br>-39 < <i>l</i> < 40                        | -13 < <i>h</i> < 13;<br>-22 < <i>k</i> < 22;<br>-34 < <i>l</i> < 34                                          |
| Broj izmjerenih refleksa                                                                     | 59567                                                                                      | 340296                                                                                                       |
| Broj neovisnih refleksa                                                                      | 11255                                                                                      | 10611                                                                                                        |
| Broj opaženih refleksa, <i>I</i> > 2 $\sigma$ ( <i>I</i> )                                   | 11255                                                                                      | 10611                                                                                                        |
| Apsorpcijska korekcija                                                                       | analitička                                                                                 | analitička                                                                                                   |
| <i>T</i> <sub>min</sub> ; <i>T</i> <sub>max</sub>                                            | 0,9820; 0,9950                                                                             | –                                                                                                            |
| <i>R</i> <sub>int</sub>                                                                      | 0,0189                                                                                     | 0,01606                                                                                                      |
| <i>Sferno utočnjavanje</i>                                                                   |                                                                                            |                                                                                                              |
| Težinska shema                                                                               | $w = 1 / [\sigma^2 (F_o^2) + (0,0775P)^2 + 0,4476P]$<br>gdje je $P = (F_o^2 + 2F_c^2) / 3$ | $w = 1 / [\sigma^2 (F_o^2) + (0,0775P)^2 + 0,4476P]$<br>gdje je $P = (F_o^2 + 2F_c^2) / 3$                   |
| <i>R</i> ( <i>F</i> )                                                                        | 0,0311                                                                                     | 0,0173                                                                                                       |
| <i>R</i> <sub>w</sub> ( <i>F</i> <sup>2</sup> )                                              | 0,1059                                                                                     | 0,0448                                                                                                       |
| <i>Goodness of fit</i> , <i>S</i>                                                            | 0,861                                                                                      | 1,036                                                                                                        |
| Tretiranje atoma H                                                                           | slobodno utočnjeni,<br>izotropni                                                           | slobodno utočnjeni,<br>izotropni                                                                             |
| Broj parametara                                                                              | 208                                                                                        | 136                                                                                                          |
| Broj ograničenja                                                                             | 0                                                                                          | 0                                                                                                            |
| $\Delta\rho_{\max}$ , $\Delta\rho_{\min}$ , $\Delta\rho_{\text{rms}}$<br>(eÅ <sup>-3</sup> ) | 0,915; -0,304; 0,073                                                                       | 1,433; -0,933; 0,101                                                                                         |

Tablica D13. Nastavak

| Spoj                             | 1 | 4 |
|----------------------------------|---|---|
| <i>Multipolarno utočnjavanje</i> |   |   |

|                                                                                               |                                               |                              |
|-----------------------------------------------------------------------------------------------|-----------------------------------------------|------------------------------|
| Težinska shema                                                                                | $w = 1 / [6\sigma^2(F_o^2)]$                  | $w = 1 / [6\sigma^2(F_o^2)]$ |
| $R (F)$                                                                                       | 0,0298                                        | 0,0197                       |
| $R_w (F^2)$                                                                                   | 0,0285                                        | 0,0274                       |
| <i>Goodness of fit, S</i>                                                                     | 1,518                                         | 0,920                        |
| Tretiranje atoma H                                                                            | s geometrijskim<br>ograničenjima; anizotropni | fiksirani; izotropni         |
| Broj parametara                                                                               | 709                                           | 564                          |
| Broj ograničenja                                                                              | 477                                           | 49                           |
| $\Delta\rho_{\max}, \Delta\rho_{\min}, \Delta\rho_{\text{rms}}$ ( $\text{e}\text{\AA}^{-3}$ ) | 0,366; -0,369; 0,064                          | 0,660; -0,765; 0,100         |

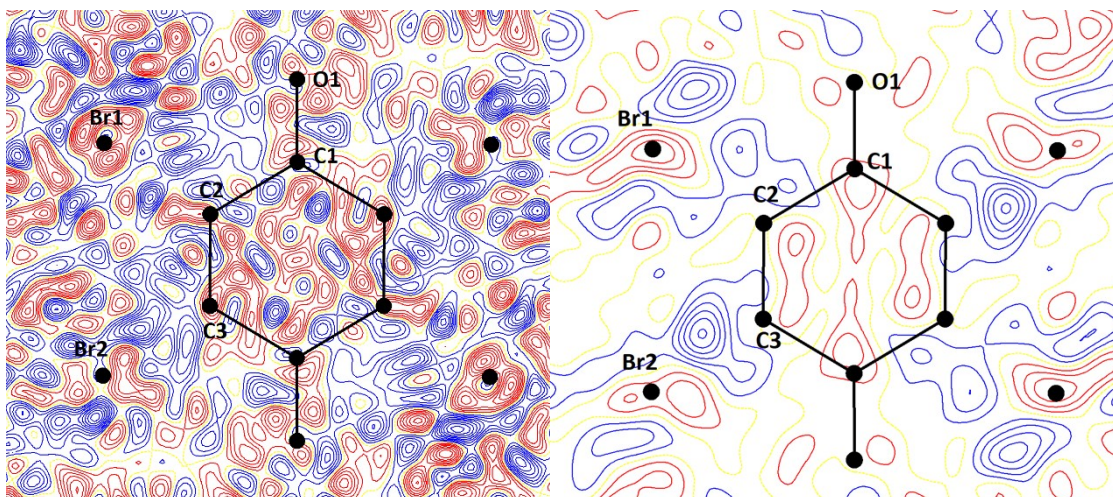

Slika D9. Mape rezidualne gustoće u ravni  $\text{Br}_4\text{Q}$  u spoju 4 prikazane sa svim refleksima (lijevo) i s refleksima pri niskim kutevima (desno;  $s < 0,7 \text{ \AA}^{-1}$ ), nakon multipolarnog utočnjavanja. Pozitivna gustoća prikazana je plavim linijama, negativna crvenim linijama, i žute točkaste linije predstavljaju područja gdje je gustoća jednaka nuli. Konture predstavljaju elektronsku gustoću od  $0,05 \text{ e \AA}^{-3}$ .

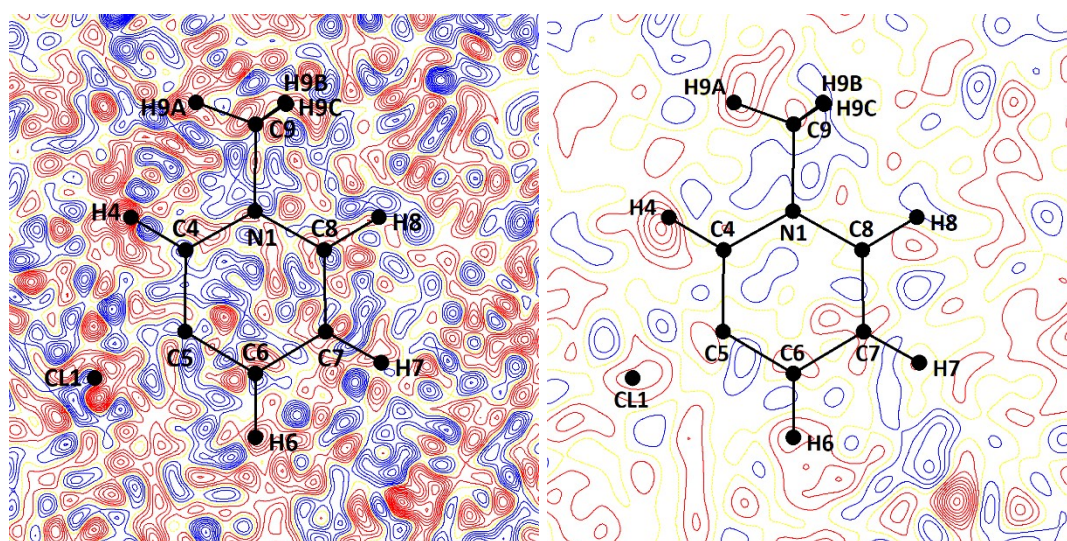

Slika D10. Mape rezidualne gustoće u ravni  $N\text{-Me-3-Clpy}$  u spoju 4 prikazane sa svim refleksima (lijevo) i s refleksima pri niskim kutevima (desno;  $s < 0,7 \text{ \AA}^{-1}$ ), nakon multipolarnog utočnjavanja. Pozitivna gustoća prikazana je plavim linijama, negativna crvenim linijama, i žute točkaste linije predstavljaju područja gdje je gustoća jednaka nuli. Konture predstavljaju elektronsku gustoću od  $0,05 \text{ e \AA}^{-3}$ .
